# Supplementary material for: Are adverse childhood experiences associated with late-life cognitive performance across racial/ethnic groups: results from the Kaiser Healthy Aging and Diverse Life Experiences study baseline
Source: PubMed Central journal article supplement — BMJ Open. 2021 Feb 5;11(2):e042125. doi: 10.1136/bmjopen-2020-042125 (PMC7925876; doi:10.1136/bmjopen-2020-042125), 2021-02-05
Supplement: bmjopen-2020-042125.draft_revisions.pdf [file bmjopen-2020-042125.draft_revisions.pdf]

# BMJ Open

BMJ Open is committed to open peer review. As part of this commitment we make the peer review history of every article we publish publicly available.

When an article is published we post the peer reviewers' comments and the authors' responses online. We also post the versions of the paper that were used during peer review. These are the versions that the peer review comments apply to.

The versions of the paper that follow are the versions that were submitted during the peer review process. They are not the versions of record or the final published versions. They should not be cited or distributed as the published version of this manuscript.

BMJ Open is an open access journal and the full, final, typeset and author-corrected version of record of the manuscript is available on our site with no access controls, subscription charges or pay-per-view fees (<http://bmjopen.bmj.com>).

If you have any questions on BMJ Open's open peer review process please email [info.bmjopen@bmj.com](mailto:info.bmjopen@bmj.com)

# BMJ Open

## Adverse Childhood Experiences and Late Life Cognitive Performance Across Racial/Ethnic Groups: Results from the Kaiser Healthy Aging and Diverse Life Experiences Study

|                               |                                                                                                                                                                                                                                                                                                                                                                                                                                                                                                                                                                                                                                                                                                                                                                                                                                                             |
|-------------------------------|-------------------------------------------------------------------------------------------------------------------------------------------------------------------------------------------------------------------------------------------------------------------------------------------------------------------------------------------------------------------------------------------------------------------------------------------------------------------------------------------------------------------------------------------------------------------------------------------------------------------------------------------------------------------------------------------------------------------------------------------------------------------------------------------------------------------------------------------------------------|
| Journal:                      | <i>BMJ Open</i>                                                                                                                                                                                                                                                                                                                                                                                                                                                                                                                                                                                                                                                                                                                                                                                                                                             |
| Manuscript ID                 | bmjopen-2020-042125                                                                                                                                                                                                                                                                                                                                                                                                                                                                                                                                                                                                                                                                                                                                                                                                                                         |
| Article Type:                 | Original research                                                                                                                                                                                                                                                                                                                                                                                                                                                                                                                                                                                                                                                                                                                                                                                                                                           |
| Date Submitted by the Author: | 30-Jun-2020                                                                                                                                                                                                                                                                                                                                                                                                                                                                                                                                                                                                                                                                                                                                                                                                                                                 |
| Complete List of Authors:     | Gold, Audra; University of California San Francisco, Department of Epidemiology and Biostatistics<br>Meza, Erika; University of California San Francisco, Department of Epidemiology and Biostatistics<br>Ackley, Sarah ; University of California, San Francisco, Epidemiology and Biostatistics<br>Mungas, Dan; University of California Davis<br>Whitmer, Rachel; University of California Davis; Kaiser Permanente Division of Research<br>Mayeda, Elizabeth Rose; University of California, Los Angeles Fielding School of Public Health, Epidemiology<br>Miles, Sunita; Kaiser Permanente Division of Research<br>Eng, Chloe; University of California San Francisco, Epidemiology and Biostatistics<br>Gilsanz, Paola; Kaiser Permanente Division of Research<br>Glymour, M; University of California, San Francisco, Epidemiology and Biostatistics |
| Keywords:                     | EPIDEMIOLOGY, Community child health < PAEDIATRICS, Adverse events < THERAPEUTICS                                                                                                                                                                                                                                                                                                                                                                                                                                                                                                                                                                                                                                                                                                                                                                           |
|                               |                                                                                                                                                                                                                                                                                                                                                                                                                                                                                                                                                                                                                                                                                                                                                                                                                                                             |

SCHOLARONE™  
Manuscripts

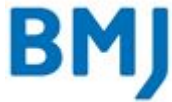

I, the Submitting Author has the right to grant and does grant on behalf of all authors of the Work (as defined in the below author licence), an exclusive licence and/or a non-exclusive licence for contributions from authors who are: i) UK Crown employees; ii) where BMJ has agreed a CC-BY licence shall apply, and/or iii) in accordance with the terms applicable for US Federal Government officers or employees acting as part of their official duties; on a worldwide, perpetual, irrevocable, royalty-free basis to BMJ Publishing Group Ltd ("BMJ") its licensees and where the relevant Journal is co-owned by BMJ to the co-owners of the Journal, to publish the Work in this journal and any other BMJ products and to exploit all rights, as set out in our [licence](#).

The Submitting Author accepts and understands that any supply made under these terms is made by BMJ to the Submitting Author unless you are acting as an employee on behalf of your employer or a postgraduate student of an affiliated institution which is paying any applicable article publishing charge ("APC") for Open Access articles. Where the Submitting Author wishes to make the Work available on an Open Access basis (and intends to pay the relevant APC), the terms of reuse of such Open Access shall be governed by a Creative Commons licence – details of these licences and which [Creative Commons](#) licence will apply to this Work are set out in our licence referred to above.

Other than as permitted in any relevant BMJ Author's Self Archiving Policies, I confirm this Work has not been accepted for publication elsewhere, is not being considered for publication elsewhere and does not duplicate material already published. I confirm all authors consent to publication of this Work and authorise the granting of this licence.

1  
2  
3  
4  
5  
6  
7  
8  
9  
10  
11  
12  
13  
14  
15  
16  
17  
18  
19  
20  
21  
22  
23  
24  
25  
26  
27  
28  
29  
30  
31  
32  
33  
34  
35  
36  
37  
38  
39  
40  
41  
42  
43  
44  
45  
46  
47  
48  
49  
50  
51  
52  
53  
54  
55  
56  
57  
58  
59  
60

## Adverse Childhood Experiences and Late Life Cognitive Performance Across Racial/Ethnic Groups: Results from the Kaiser Healthy Aging and Diverse Life Experiences Study

### Authors:

Audra L. Gold<sup>1</sup>, Erika Meza<sup>1</sup>, Sarah F. Ackley<sup>1</sup>, Dan M Mungas<sup>2</sup>, Rachel A Whitmer<sup>2,3</sup>, Elizabeth Rose Mayeda<sup>4</sup>, Sunita Miles<sup>3</sup>, Chloe Eng<sup>1</sup>, Paola Gilsanz<sup>3</sup>, M. Maria Glymour<sup>1</sup>

<sup>1</sup> Department of Epidemiology and Biostatistics  
University of California, San Francisco

<sup>2</sup> University of California, Davis

<sup>3</sup> Kaiser Permanente Division of Research

<sup>4</sup> Department of Epidemiology  
University of California, Los Angeles Fielding School of Public Health

Correspondance to:

M.Maria Glymour, maria.glymour@ucsf.edu  
550 16th Street, San Francisco, CA 94158

**Text word count: 3,097**

**Abstract (word count=222)**

**Objectives:** Evidence on adverse childhood experiences (ACEs) and late-life cognitive outcomes is inconsistent, with little research among diverse racial/ethnic groups. We investigated whether ACE exposure would predict worse late-life cognition for all racial/ethnic groups, and at different ages of exposure.

**Design:** Covariate-adjusted mixed-effects linear regression models estimated associations of (1) total number of ACEs experienced, (2) earliest age when ACE occurred, and (3) type of ACE with overall cognition.

**Setting:** Kaiser Permanente Northern California (KPNC) members aged 65 years and older, living in Northern California.

**Participants:** Kaiser Healthy Aging and Diverse Life Experiences study baseline participants, aged 65 years and older (n=1,661; including 403 Asian-American, 338 Latino, 427 Black, and 493 White participants).

**Results:** Most respondents (69%) reported one or more ACE, most frequently family illness (36%), domestic violence (23%), and parental divorce (22%). ACE count was not adversely associated with cognition overall ( $\beta=0.01$ ; 95% CI: -0.01 to 0.03), in any racial/ethnic group, or for any age-category of exposure. Pooling across all race/ethnicities, parent's remarriage ( $\beta=-0.11$ ; 95% CI: -0.20 to -0.03), mother's death ( $\beta=-0.18$ ; 95% CI: -0.30 to -0.07), and father's death ( $\beta=-0.11$ ; 95% CI: -0.20 to -0.01) were associated with worse cognition.

**Conclusion:** Adverse childhood exposures overall did not predict worse cognition in older adults in a diverse sample, although three ACEs were associated with worse cognitive outcomes.

**Strengths and limitations of this study**

- Evidence on the effect of ACEs on late-life cognitive performance and decline is mixed, with very little research conducted in populations with substantial racial/ethnic diversity.
- In the Kaiser Healthy Aging and Diverse Life Experiences cohort, comprising participants aged 65 years and older identifying as Black, Asian-American, Latino, or White, exposure to Adverse Childhood Experiences (ACE) was not associated with worse late-life cognition in any racial/ethnic group, and associations did not differ by age of ACE exposure
- Only parental remarriage and parental death were consistently associated with worse cognitive outcomes in late life.
- Primary limitations of the present study include reliance on a cross-sectional sample and self-reported ACEs.

## Introduction

Adverse childhood experiences (ACEs), such as abuse, violence, and household dysfunction have lasting harmful impacts on adult physical and mental health,<sup>1-3</sup> but evidence on the effect of ACEs on late-life cognitive performance and decline is mixed.<sup>4-6</sup> Prior studies indicate heterogeneities in the association of ACEs and cognitive outcomes by age of exposure, type of ACE, race/ethnicity, and sources of resilience. For example, Ravona-Springer (2012) found that death of a parent during childhood was associated with substantially higher risk of dementia when the experience occurred between the ages of 0 and 6, but the excess dementia risk attenuated the older the age of ACE exposure. Additional findings suggest that while some ACEs appear to adversely affect late-life cognitive functioning, other ACEs predict better cognitive outcomes.<sup>6</sup>

Both exposure to and consequences of ACEs may differ by race/ethnicity. Significant racial and ethnic differences in the prevalence of ACEs as well as between types of adversities have been documented.<sup>8</sup> To date, there has been only one multi-racial study evaluating ACEs and cognition: Barnes et al found no association between early-life adverse events and cognitive decline in Whites, while early-life food deprivation was associated with better cognitive outcomes for African Americans.<sup>4</sup> No other studies have directly compared effects across racial/ethnic groups.

We investigated the association of ACEs with later-life cognitive performance in the Kaiser Healthy Aging and Diverse Life Experiences (KHANDLE) cohort. We hypothesized that ACE exposure would predict worse late-life cognition for all racial/ethnic groups, with the largest effects associated with experiences when aged 0-6 years.

## Methods:

### Study participants and data collection

We used baseline data from the Kaiser Healthy Aging and Diverse Life Experiences (KHANDLE) cohort, which comprises community-dwelling older adults residing in the San Francisco Bay and Sacramento areas of California. KHANDLE aims to evaluate how race/ethnicity and life course health and sociocultural factors influence late-life brain health and cognitive decline. Individuals eligible for KHANDLE: were long-term members of Kaiser Permanente Northern California, an integrated healthcare delivery system; were age 65 years or older on January 1, 2017; spoke English or Spanish; and had previously participated in Kaiser Permanente multiphasic health checkup exams between 1964-1985. Stratified random sampling by race/ethnicity and educational attainment was used with the goal of recruiting approximately equal proportions of Asian, Black, Latino, and White participants and achieving diversity in educational attainment. Exclusion criteria included: electronic medical record diagnosis of dementia or other neurodegenerative disease (frontotemporal dementia, Lewy body disease, Pick's disease, Parkinson's disease with dementia, Huntington's disease); and presence of health conditions that would impede participation in study interviews, defined by hospice activity in the past 12 months, history of severe chronic obstructive pulmonary disease in the past 6 months, congestive heart failure hospitalizations in the past 6 months, and history of end stage renal disease or dialysis in the past 12 months. At baseline, 1,712 individuals were enrolled.

1  
2  
3 Individuals who self-identified as Native Americans (n=3) or refused to self-identify  
4 race/ethnicity (n=1) were dropped from the sample used in this analysis. After excluding 13  
5 individuals who were missing all cognitive measures used in this analysis and 34 individuals  
6 missing all ACEs, the final analytic sample size was 1,661. All respondents provided informed  
7 consent and completed an interview in English or Spanish either in-home or at a Kaiser  
8 Permanente Facility (approximately 40% of baseline interviews were conducted at a facility and  
9 60% in-home).  
10  
11

12 Kaiser Permanente Northern California (KPNC) is a large, integrated healthcare delivery system  
13 that provides comprehensive medical care to over 4 million members.<sup>9</sup> Prior work indicated the  
14 member population was generally representative of the overall regional population, though  
15 individuals at extreme tails of the income distribution were underrepresented.<sup>10-12</sup> The KPNC  
16 older adult population (aged 65+) are generally similar to the population of seniors residing in  
17 Northern California with respect to medical history of chronic conditions, including diabetes,  
18 hypertension, heart disease, and asthma, and lifestyle factors, including smoking, obesity, and  
19 sedentary lifestyle.<sup>12</sup>  
20  
21  
22

### 23 **Measures**

24  
25 Our cognitive outcomes are standardized scores from the following three cognitive domains:  
26 verbal episodic memory, semantic memory, and executive functioning. These scores were  
27 obtained from the Spanish and English Neuropsychological Assessment Scales (SENAS), which  
28 was given to all participants in their preferred language (English or Spanish).<sup>13</sup> The SENAS is a  
29 battery of cognitive tests that has previously undergone extensive development for valid  
30 comparisons of cognition across racial/ethnic and linguistically diverse groups. Verbal episodic  
31 memory composite scores were derived from a multiracial word-list-learning test. Semantic  
32 memory composite scores were derived from verbal (object-naming) and nonverbal (picture  
33 association) tests. Executive function composite scores were obtained using component tasks of  
34 category fluency, phonemic (letter) fluency, and working memory (digit-span backward, visual-  
35 span backward, list sorting). Details of the administration procedures, development, and  
36 psychometric characteristics have been extensively described in previous publications.<sup>13</sup>  
37 Analyses used cognitive data for everyone who had cognitive measures for at least one of the  
38 three cognitive domains.  
39  
40  
41

42 KHANDLE fielded a modified version of the assessment of ACEs used in the Reasons for  
43 Geographic and Racial Disparities in Stroke (REGARDS) cohort.<sup>14</sup> Participants were asked  
44 aloud by the interviewer if they had experienced each of 9 ACEs when they were age 16 or  
45 younger: parents were divorced or separated; parents remarried; witnessed domestic violence;  
46 substance abuse by a family member; loss of a job by a parent; parent had to go to jail; serious  
47 illness of a family member; death of mother; and death of father. If any ACE was experienced,  
48 respondents were asked the youngest age at which they experienced the event. A composite ACE  
49 score was constructed as a count of the number ever experienced, with the scores ranging from 0  
50 if no ACE had been experienced to 9 if every ACE had been experienced. For individuals  
51 missing one or more ACE item, we imputed the values to the average of the total observed ACEs  
52 for that individual (i.e., if the individual responded to 6 ACE items and endorsed 3 of them, the  
53 values of the missing 3 items were imputed to 0.5). Since few people reported more than 4 ACEs  
54  
55  
56  
57  
58  
59  
60



1  
2  
3 (n=161), the count of ACEs was top coded at 4 for our analyses. Age-specific ACEs were  
4 constructed as the count of the number of experiences reported as first occurring in specific age  
5 categories (0-6, 7-12, and 13-16).  
6

7 Because ACEs are experienced in early life, there are few plausible confounders that might  
8 influence both ACEs and late-life cognitive outcomes. All models were either adjusted for or  
9 stratified by race/ethnicity (classified as Black, White, Latino, or Asian). All models were also  
10 adjusted for linear and quadratic terms for year of age over 65 at cognitive assessment, sex, and  
11 parental education. Parental educational attainment was reported by the respondent as highest  
12 level of education completed. Maternal and paternal education for primary and secondary  
13 education was coded as number of years of primary or secondary education, ranging from 0 to  
14 12. We additionally adjusted for parental higher education as a continuous predictor: 0=no higher  
15 education; 1=some college but no degree or associates degree; 2=bachelor's degree, master's  
16 degree or other higher education. If values for parental education were missing (n=276 and  
17 n=417 missing for maternal and paternal, respectively) they were coded as 0 (lowest category),  
18 and we additionally adjusted for an indicator variable for missingness.  
19  
20  
21  
22

### 23 **Statistical Analysis:**

24  
25 Baseline variables gender, race/ethnicity, and parental education were tabulated by ACE  
26 composite score. The prevalence of each ACE was estimated for the entire sample and stratified  
27 by race/ethnicity.  
28

29 If the effect of ACEs were the same for all three domains of cognition, it would be most efficient  
30 to estimate a single mixed model including each individual's three outcome assessments (verbal  
31 memory, semantic memory, and executive function) and derive a single effect estimate  
32 applicable to all domains. This added efficiency is especially important when estimating  
33 race/ethnicity specific effects where sample sizes are smaller. Before estimating such a model,  
34 we first had to assess whether it was appropriate to estimate a single effect of ACE exposure on  
35 all three cognitive domains within each racial/ethnic group.  
36  
37  
38

39 In initial models, we therefore tested for domain-specific effects of composite ACE score on  
40 cognition for each racial/ethnic group. To do this, we used a mixed-effects linear regression  
41 model with the three standardized cognitive domains as outcomes with random intercepts to  
42 account for within-person correlation between cognitive domains. All models were controlled for  
43 indicators of cognitive domain (e.g., verbal memory or semantic memory, with executive  
44 function treated as the reference outcome), allowing for the possibility that average score differs  
45 between domains. We also included interactions between race/ethnicity and domain (allowing  
46 for the possibility that domain differences vary by race/ethnicity) and interactions between each  
47 person's composite ACE score and each race/ethnicity-domain combination (allowing for the  
48 possibility that the effect of ACE exposure differs for any combination of race/ethnicity and  
49 cognitive domain). An F-test for the null hypothesis that the race/ethnicity-specific ACE  
50 associations with cognition varied significantly across domains indicated evidence of  
51 heterogeneity (P=0.09). When we evaluated individual comparisons, we found one significant  
52 domain-specific difference: the association between ACE score and semantic memory among  
53  
54  
55  
56  
57  
58  
59  
60



1  
2  
3 Asian American respondents. For both other domains in Asian Americans and for all domains in  
4 the other three racial/ethnic groups, the statistical tests indicated estimation of a single parameter  
5 for estimated effects of ACEs on cognition was appropriate. In all subsequent models,  
6 interactions between Asian American, semantic memory, and the ACE measure were included to  
7 estimate the association of ACEs with semantic memory among Asian Americans separately  
8 from all other associations. In these models, the coefficient for the ACE measure can be  
9 interpreted as the association of ACEs with cognition, averaged across domains (results are very  
10 similar to what would be obtained if the different domains were averaged in advance and treated  
11 as a single outcome) except excluding the effect of ACEs on semantic memory among Asian  
12 Americans. Associations between ACE exposure and semantic memory among Asian American  
13 respondents are reported in the Appendix.  
14  
15  
16

17 We then used covariate-adjusted linear mixed models to estimate the association of composite  
18 ACE score with cognition in pooled analyses and in models stratified by race-ethnicity. To  
19 evaluate whether differences in coefficients between racial/ethnic groups were statistically  
20 significant, we incorporated race/ethnicity by ACE score interactions and used an F-test. Because  
21 of limited prior evidence on racial/ethnic specific associations, we present these even when the  
22 F-test indicated no evidence of statistically significant heterogeneity.  
23  
24  
25

26 Covariate adjusted mixed-effects linear regression models were also estimated to evaluate the  
27 association between composite ACE scores at specific age categories (0-6, 7-12, and 13-16) and  
28 cognition for the full sample and in models stratified by race/ethnicity.  
29

30 Finally, we evaluated the association of each of the 9 individual ACEs and standardized  
31 cognitive score and whether these associations differed by race/ethnicity or by age ranges of  
32 exposure (0-6; 7-12; 13-16). Results for age-specific associations with individual ACE exposures  
33 are given in the Appendix.  
34

35 Analyses were conducted using STATA SE 15 (STATA Corporation, College Station, TX,  
36 2003).  
37  
38

## 39 Results

40 Among the 1,661 participants enrolled in the KHANDLE baseline, 69% reported experiencing at  
41 least one ACE prior to age 16: 448 individuals (27%) reported experiencing 1 ACE; 336 (20%)  
42 reported 2 ACEs; 203 (12%) reported 3 ACEs, and 161 (10%) reported 4+ ACEs (Table 1).  
43 Among the 9 individual ACEs, illness in the family had the highest overall prevalence at 36%,  
44 followed by domestic violence (23%), and parental divorce (22%) (Figure 1). Both the  
45 distribution of total ACE score and the prevalence of each specific ACE varied by race/ethnicity.  
46  
47  
48

49 In covariate-adjusted mixed-effects linear regression models, there was no association between  
50 the composite ACE score and standardized cognition when considering all racial/ethnic groups in  
51 a pooled analysis ( $\beta = 0.01$ ; 95% CI, -0.01 to 0.03) (Table 2). Age-specific ACE exposures were  
52 not significantly associated with cognition (ACE scores ages 0-6,  $\beta = 0.01$ ; 95% CI, -0.03 to 0.05;  
53 ACE scores ages 7-12,  $\beta = -0.03$ ; 95% CI, -0.07 to 0.01; or ACE score ages 13-16,  $\beta = 0.01$ ;  
54 95% CI, -0.05 to 0.06) (Table 2). When evaluating the association between total ACE score and  
55  
56  
57  
58  
59  
60

1  
2  
3 cognition for each racial/ethnic group, the only apparent association was for Asian Americans,  
4 among whom each unit increase in the composite ACE was associated with better cognitive  
5 scores (estimated association based on verbal memory and executive function,  $\beta = 0.07$ ; 95% CI,  
6 0.01 to 0.14). Although this individual race-specific association was statistically significant, the  
7 overall test for differences in the association of ACE composite score and cognition across  
8 racial/ethnic groups was not significant ( $p = 0.13$ ) after excluding the single Asian-semantic  
9 memory comparison.  
10  
11

12 Interactions between race/ethnicity and age-specific ACE exposures were also non-significant.  
13 There was no evidence of associations between age-specific ACE exposures and cognition  
14 overall, although Asian Americans exposed to ACEs age 13-16 averaged worse cognition  $\beta =$   
15 0.12; 95% CI, -0.24 to 0.00) (Table 2).  
16  
17

18 Pooling across all race/ethnicities, three types of ACE exposures were associated with worse  
19 cognition: parent remarried; death of mother; and death of a father (Table 3). Although there  
20 were some differences in the associations of individual ACEs with standardized cognition  
21 between racial/ethnic groups, differences were consistent with chance (i.e., the tests of  
22 heterogeneity in the ACE associations with cognition across racial/ethnic groups were not  
23 statistically significant). Patterns were generally similar when evaluating cognition based on  
24 indicator variables for age of first exposure overall and race/ethnicity (Appendix Table 1).  
25  
26  
27

## 28 Discussion

29 Retrospectively reported exposure to childhood ACEs was prevalent in a sample of long-term  
30 elderly Kaiser Permanente Northern California (KPNC) members, but ACEs were not associated  
31 with cognition in later-life among White, Black, or Latino respondents. Results were similar for  
32 total ACE count and ACE exposures during age groups categorized as 0-6, 7-12, and 13-16.  
33 Among Asian American respondents, higher ACE count was associated with slightly better  
34 cognitive performance. Among the individual ACEs, three experiences were associated with  
35 significantly worse cognition when pooling across all racial/ethnic groups, but when examining  
36 each racial/ethnic group separately, point estimates indicated adverse associations only for  
37 parents remarried and death of a mother (albeit with wide confidence intervals in racial/ethnic  
38 group specific estimates). For other ACEs, associations were inconsistent and, in several  
39 instances, positive. All racial/ethnic differences in ACE by cognition associations were  
40 consistent with chance.  
41  
42  
43  
44

45 Our finding of no association between overall ACE count and cognition is surprising in light of  
46 prior evidence that ACEs influence multiple domains of adult physical health.<sup>1,15</sup> However, prior  
47 findings in early work on ACEs and cognition has been mixed and has been conducted in  
48 predominantly White samples. Very few prior studies include multi-racial samples or  
49 assessments with both age-specific ACE exposure and late-life cognitive outcomes. This is  
50 important to evaluate because race/ethnicity is strongly associated with economic, social,  
51 political, and environmental factors that influence cognitive aging.<sup>16,17</sup> These factors may modify  
52 the consequences of ACEs for cognition in late life or may create selection processes such that  
53 only especially resilient individuals survive to late life. For example, increased exposure to  
54  
55  
56  
57  
58  
59  
60

1  
2  
3 extreme adversity across the lifecourse may blunt the special relevance of childhood adversity  
4 among racial/ethnic minorities in the United States.  
5

6 Our findings do suggest that parental remarriage and parental death are associated with worse  
7 cognitive outcomes in late life. The exposures were common, especially for racial/ethnic  
8 minorities. The importance of these experiences over other adversities may imply the special  
9 relevance of a child being separated from the parent.  
10

11  
12 Prior studies have documented significant racial and ethnic differences in the prevalence of total  
13 ACEs as well as between types of adversity, such as incarceration of a family member versus  
14 domestic violence, in the U.S.<sup>8</sup> ACEs are strongly patterned by socioeconomic status and  
15 neighborhood context.<sup>18</sup> Barnes et al reported that in a cohort of 6,105 older African Americans  
16 and Whites followed for up to 16 years, there was no association between early life adverse  
17 events and rate of cognitive decline in Whites, while food deprivation and being thinner than  
18 average in early life were associated with better cognitive outcomes for African Americans.<sup>4</sup>  
19 Food deprivation is not commonly used in ACE surveys and was not included in the KHANDLE  
20 baseline survey.  
21  
22

23  
24 Although point estimates for the effects of ACEs among Whites were generally more adverse  
25 than for other racial/ethnic groups, only for Asian American did we find evidence of a  
26 statistically significant difference. Among Asian Americans, higher ACE count was associated  
27 with better overall cognition. It is difficult to theorize how ACEs might enhance later life  
28 cognition. The positive association observed among older Asian Americans may be due to  
29 chance, selective survival, or differential recall. Especially among Asian Americans in the  
30 KHANDLE sample, many of whom were born outside the US, individuals who have migrated,  
31 survived to late life, and enrolled in the study may be an extraordinarily resilient group. This type  
32 of selection could lead to inverse associations if both ACE exposure and other determinants of  
33 late life cognition influence the process that leads to study enrollment. Chance is also a plausible  
34 explanation, as indicated by the non-significant F-test for heterogeneity between racial/ethnic  
35 groups.  
36  
37  
38

39 The limitations of the present study include reliance on a cross-sectional sample and self-  
40 reporting ACEs. This precludes evaluating within-person cognitive decline and increases  
41 vulnerability to confounding. However, confounding seems unlikely to account for the largely  
42 null results reported here. Several different ACE assessment instruments, reflecting different  
43 levels of trauma, are currently in use across the field. The survey used in KHANDLE does not  
44 include questions about physical or sexual abuse. Our null findings with the 9 ACEs assessed in  
45 KHANDLE do not rule out the relevance of other ACEs. Finally, sample size is an important  
46 limitation, although for the overall and race-specific estimates of composite ACE score and  
47 cognition associations, confidence intervals were fairly narrow and inconsistent with especially  
48 large benefits or harms. KHANDLE is, to our knowledge, the only available community-based  
49 study with information on the four largest racial/ethnic groups represented in the US and  
50 rigorous cognitive assessments in older adults. We have reported finely grained results to  
51 facilitate future meta-analyses. This study did not directly address dementia because the  
52 participants were screened at baseline to be free of dementia. Differences in cognitive  
53  
54  
55  
56  
57  
58  
59  
60

1  
2  
3 performance in late life are relevant for anticipating dementia risk, however, because of the  
4 established importance of cognitive reserve.<sup>19,20</sup> Our findings, therefore, if taken at face value,  
5 suggest these ACEs may not have major relevance for subsequent dementia risk.  
6

7  
8 Our results suggest that previously reported findings linking ACEs to cognitive outcomes in late  
9 life may be over-estimated or may not hold in many communities. These findings should be  
10 interpreted cautiously until replicated in additional multi-ethnic samples. Given the robust  
11 evidence of early life experiences overall for cognitive reserve and dementia risk, these results  
12 would suggest a focus on other aspects of childhood, such as material deprivation or educational  
13 experiences.  
14

15  
16 **Figure 1 caption:** Grey vertical line segments indicate exact binomial confidence intervals

17  
18 **Competing interests:** authors declare no competing interests.  
19

20  
21 **Funding:** This work was supported by the National Institutes of Health grant numbers  
22 RF1AG052132, R00AG053410, R01AG066132, T32AG049663, and RF1AG055486.  
23

24  
25 **Author contributions:** AG, EM, SA, DM, RW, ERM, and MMG were involved with the study  
26 design, data collection, data analysis, and reporting the results. SM and CE were involved with  
27 the data collection, data analysis, and reporting the results. All authors revised it critically for  
28 important intellectual content. All authors approved the final version of the manuscript, and  
29 agree to be accountable for all aspect of the work.  
30

31  
32 **Patient and public involvement:** Patients and/or the public were not involved in the design, or  
33 conduct, or reporting, or dissemination plans of this research.  
34

35  
36 **Patient consent for publication:** Not required.  
37

38  
39 **Ethics Approval:** Ethical approval was granted by the Kaiser Permanente Northern California  
40 Institutional Review Board (IRB Number: CN-16-2786).  
41

42  
43 **Data availability statement:** De-identified data are available to qualified investigators from the  
44 KHANDLE Leadership Committee upon approval for the purposes of replicating procedures and  
45 results.  
46  
47  
48  
49  
50  
51  
52  
53  
54  
55  
56  
57  
58  
59  
60

**Table 1: Descriptive Statistics, KHANDLE Cohort**

| Variable                      | Level                                                     | Composite ACE Score |                |                |                |                |
|-------------------------------|-----------------------------------------------------------|---------------------|----------------|----------------|----------------|----------------|
|                               |                                                           | 0                   | 1              | 2              | 3              | 4+             |
| <b>N</b>                      | 1,661                                                     | 513<br>(100%)       | 448<br>(100%)  | 336<br>(100%)  | 203<br>(100%)  | 161<br>(100%)  |
| <b>Age (years), mean (SD)</b> | 76.0 (6.8)                                                | 75.7<br>(6.6)       | 76.6<br>(6.9)  | 76.1<br>(6.9)  | 76.0<br>(6.7)  | 74.6<br>(6.4)  |
| <b>Gender</b>                 | Female                                                    | 223<br>(43.5%)      | 182<br>(40.6%) | 133<br>(39.6%) | 74<br>(36.5%)  | 63<br>(39.1%)  |
|                               | Male                                                      | 290<br>(56.5%)      | 266<br>(59.4%) | 203<br>(60.4%) | 129<br>(63.5%) | 98<br>(60.9%)  |
| <b>Race/Ethnicity</b>         | Asian                                                     | 181<br>(35.3%)      | 111<br>(24.8%) | 68<br>(20.2%)  | 29<br>(14.3%)  | 14<br>(8.7%)   |
|                               | Black                                                     | 105<br>(20.5%)      | 116<br>(25.9%) | 92<br>(27.4%)  | 66<br>(32.5%)  | 48<br>(29.8%)  |
|                               | Latino                                                    | 71<br>(13.8%)       | 82<br>(18.3%)  | 85<br>(25.3%)  | 51<br>(25.1%)  | 49<br>(30.4%)  |
|                               | White                                                     | 156<br>(30.4%)      | 139<br>(31.0%) | 91<br>(27.1%)  | 57<br>(28.1%)  | 50<br>(31.1%)  |
| <b>Maternal education</b>     | Mean years of education among those with <=12 years, (SD) | 8.46<br>(4.73)      | 7.76<br>(4.87) | 7.78<br>(4.74) | 7.98<br>(5.00) | 7.83<br>(4.76) |
|                               | Some college but no degree/ associates degree             | 59<br>(11.5%)       | 51<br>(11.4%)  | 38<br>(11.3%)  | 25<br>(12.3%)  | 14<br>(8.7%)   |
|                               | Bachelor's or more                                        | 63<br>(12.3%)       | 34<br>(7.6%)   | 32<br>(9.5%)   | 18<br>(8.9%)   | 10<br>(6.2%)   |
| <b>Paternal education</b>     | Mean years of education among those with <=12 years, (SD) | 8.51<br>(4.75)      | 7.29<br>(5.16) | 6.82<br>(5.36) | 6.19<br>(5.21) | 6.53<br>(5.45) |
|                               | Some college but no degree/ associates degree             | 60<br>(11.7%)       | 43<br>(9.6%)   | 32<br>(9.5%)   | 21<br>(10.3%)  | 12<br>(7.5%)   |
|                               | Bachelor's or more                                        | 110<br>(21.4%)      | 70<br>(15.6%)  | 46<br>(13.7%)  | 14<br>(6.9%)   | 15<br>(9.3%)   |

**Table 2. Mixed-effects linear regression coefficients (95% confidence intervals) for the difference in cognitive scores associated with total childhood or age-specific count of ACEs (0 to 4+), overall and stratified by race/ethnicity.**

|                                                                                       | <b>Total childhood ACEs</b> | <b>Early childhood (0-6 years) ACEs</b> | <b>Middle childhood (7-12 years) ACEs</b> | <b>Adolescent (13-16 years) ACEs</b> |
|---------------------------------------------------------------------------------------|-----------------------------|-----------------------------------------|-------------------------------------------|--------------------------------------|
|                                                                                       | <b>β (95% CI)</b>           | <b>β (CI)</b>                           | <b>β (CI)</b>                             | <b>β (CI)</b>                        |
| Full sample                                                                           | 0.01 (-0.01, 0.03)          | 0.01 (-0.03, 0.05)                      | -0.03 (-0.07, 0.01)                       | 0.01 (-0.05, 0.06)                   |
| White                                                                                 | 0.00 (-0.04, 0.05)          | 0.01 (-0.05, 0.08)                      | -0.03 (-0.09, 0.03)                       | 0.07 (-0.03, 0.17)                   |
| Black                                                                                 | 0.01 (-0.03, 0.05)          | 0.04 (-0.02, 0.10)                      | -0.03 (-0.09, 0.03)                       | -0.01 (-0.09, 0.08)                  |
| Asian-American                                                                        | 0.07 (0.01, 0.14)           | 0.06 (-0.05, 0.17)                      | 0.00 (-0.11, 0.10)                        | -0.12 (-0.24, 0.00)                  |
| Latino                                                                                | -0.01(-0.06, 0.04)          | -0.04(-0.10, 0.03)                      | -0.01 (-0.08, 0.05)                       | 0.03 (-0.06, 0.13)                   |
| P-value from an F-test for interaction between ACE composite score and race/ethnicity | 0.13                        | 0.17                                    | 0.26                                      | 0.80                                 |

\* All models adjusted for age (linear and quadratic), sex, parental education and race/ethnicity (unless stratified by race/ethnicity).

\*\* All models provide a single coefficient for associations with verbal episodic memory, semantic memory, and executive function, with the exception of the coefficients for ACE association with semantic memory among Asian Americans, which are estimated separately and presented in the supplement.

**Table 3. Mixed effects linear regression coefficients (95% confidence intervals) for the difference in memory scores associated with each ACE, overall and stratified by race/ethnicity.**

| ACEs                      | Overall                 | White                  | Black                  | Asian                  | Latino                  | P-value for interaction with race/ethnicity** |
|---------------------------|-------------------------|------------------------|------------------------|------------------------|-------------------------|-----------------------------------------------|
|                           | $\beta$ (95% CI)        | $\beta$ (95% CI)       | $\beta$ (95% CI)       | $\beta$ (95% CI)       | $\beta$ (95% CI)        |                                               |
| Parents divorced          | -0.03<br>(-0.11, 0.04)  | -0.10<br>(-0.24, 0.04) | -0.03<br>(-0.15, 0.09) | 0.09<br>(-0.16, 0.35)  | -0.00<br>(-0.14, 0.14)  | 0.20                                          |
| Parents remarried         | -0.11<br>(-0.20, -0.03) | -0.10<br>(-0.26, 0.07) | -0.04<br>(-0.18, 0.09) | -0.08<br>(-0.34, 0.19) | -0.18<br>(-0.34, -0.03) | 0.74                                          |
| Domestic violence         | 0.01<br>(-0.06, 0.08)   | 0.07<br>(-0.07, 0.21)  | -0.00<br>(-0.12, 0.12) | 0.19<br>(0.00, 0.38)   | -0.07<br>(-0.21, 0.06)  | 0.11                                          |
| Witnessed substance abuse | -0.06<br>(-0.14, 0.01)  | -0.08<br>(-0.21, 0.06) | 0.02<br>(-0.11, 0.15)  | 0.18<br>(-0.10, 0.46)  | -0.16<br>(-0.29, -0.02) | 0.05                                          |
| Parent job loss           | 0.04<br>(-0.04, 0.11)   | 0.10<br>(-0.04, 0.23)  | -0.04<br>(-0.19, 0.10) | 0.16<br>(-0.04, 0.37)  | -0.04<br>(-0.19, 0.12)  | 0.26                                          |
| Parent in jail            | -0.10<br>(-0.21, 0.01)  | -0.16<br>(-0.43, 0.10) | -0.09<br>(-0.27, 0.08) | 0.17<br>(-0.11, 0.45)  | -0.13<br>(-0.32, 0.05)  | 0.29                                          |
| Family member illness     | 0.02<br>(-0.04, 0.08)   | 0.06<br>(-0.06, 0.17)  | -0.05<br>(-0.17, 0.06) | 0.11<br>(-0.04, 0.26)  | 0.00<br>(-0.12, 0.13)   | 0.29                                          |
| Death of mother           | -0.18<br>(-0.30, -0.07) | -0.10<br>(-0.34, 0.14) | -0.15<br>(-0.36, 0.06) | -0.19<br>(-0.48, 0.10) | -0.29<br>(-0.49, -0.09) | 0.67                                          |
| Death of father           | -0.11<br>(-0.20, -0.01) | 0.05<br>(-0.15, 0.25)  | -0.14<br>(-0.31, 0.03) | -0.10<br>(-0.33, 0.12) | -0.21<br>(-0.39, -0.02) | 0.55                                          |

\* All models adjusted for age (linear and quadratic), sex, parental education, and race/ethnicity (unless stratified by race/ethnicity).

\*\*P values reflect the F-test of the interaction between individual ACEs and race/ethnicity

\*\*\* All models provide a single coefficient for associations with verbal episodic memory, semantic memory, and executive function, with the exception that coefficients for ACE association with semantic memory among Asian Americans are estimated separately and presented in the supplement



## References

1. Felitti VJ, Anda RF, Nordenberg D, Williamson DF, Spitz AM, Edwards V, et al. Relationship of Childhood Abuse and Household Dysfunction to Many of the Leading Causes of Death in Adults. *Am J Prev Med.* 1998 May;14(4):245–58.
2. Anda RF, Felitti VJ, Bremner JD, Walker JD, Whitfield Ch, Perry BD, et al. The enduring effects of abuse and related adverse experiences in childhood: A convergence of evidence from neurobiology and epidemiology. *Eur Arch Psychiatry Clin Neurosci.* 2006 Apr;256(3):174–86.
3. Baglivio M, Swartz, Kimberly, Huq, Mona Sayedul, Sheer, Amy, Hardt, Nancy. The Prevalence of Adverse Childhood Experiences (ACE) in the Lives of Juvenile Offenders. 2014;
4. Barnes LL, Wilson RS, Everson-Rose SA, Hayward MD, Evans DA, Mendes de Leon CF. Effects of early-life adversity on cognitive decline in older African Americans and whites. *Neurology.* 2012 Dec 11;79(24):2321–7.
5. Korten NCM, Penninx BWJH, Pot AM, Deeg DJH, Comijs HC. Adverse Childhood and Recent Negative Life Events: Contrasting Associations With Cognitive Decline in Older Persons. *J Geriatr Psychiatry Neurol.* 2014 Jun;27(2):128–38.
6. Ritchie K, Jaussent I, Stewart R, Dupuy A-M, Courtet P, Malafosse A, et al. Adverse childhood environment and late-life cognitive functioning: Childhood adversity and late-life cognition. *Int J Geriatr Psychiatry.* 2011 May;26(5):503–10.
7. Ravona-Springer R, Beeri MS, Goldbourt U. Younger Age at Crisis Following Parental Death in Male Children and Adolescents Is Associated With Higher Risk for Dementia at Old Age: *Alzheimer Dis Assoc Disord.* 2012;26(1):68–73.
8. Mersky JP, Janczewski CE. Racial and ethnic differences in the prevalence of adverse childhood experiences: Findings from a low-income sample of U.S. women. *Child Abuse Negl.* 2018 Feb;76:480–7.
9. Klein NP, Fireman B, Goddard K, Zerbo O, Asher J, Zhou J, et al. Vaccine effectiveness of cell-culture relative to egg-based inactivated influenza vaccine during the 2017-18 influenza season. Huber VC, editor. *PLOS ONE.* 2020 Feb 26;15(2):e0229279.
10. Gordon NP, Kaplan GA. Some evidence refuting the HMO “favorable selection” hypothesis: the case of Kaiser Permanente. *Adv Health Econ Health Serv Res.* 1991;12:19–39.
11. Krieger N. Overcoming the absence of socioeconomic data in medical records: validation and application of a census-based methodology. *Am J Public Health.* 1992 May;82(5):703–10.

12. Gordon NP. Similarity of the Kaiser Permanente Senior Member Population in Northern California to the Non-Kaiser Permanente Covered and General Population of Seniors in Northern California: Statistics from the 2009 California Health Interview Survey. Kaiser Permanente Northern California Division of Research; 2012.
13. Mungas D, Reed BR, Crane PK, Haan MN, González H. Spanish and English Neuropsychological Assessment Scales (SENAS): Further Development and Psychometric Characteristics. *Psychol Assess*. 2004 Dec;16(4):347–59.
14. Howard VJ, McClure LA, Glymour MM, Cunningham SA, Kleindorfer DO, Crowe M, et al. Effect of duration and age at exposure to the Stroke Belt on incident stroke in adulthood. *Neurology*. 2013 Apr 30;80(18):1655–61.
15. Anda RF, Dong M, Brown DW, Felitti VJ, Giles WH, Perry GS, et al. The relationship of adverse childhood experiences to a history of premature death of family members. *BMC Public Health*. 2009 Dec;9(1):106.
16. Glymour MM, Manly JJ. Lifecourse Social Conditions and Racial and Ethnic Patterns of Cognitive Aging. *Neuropsychol Rev*. 2008 Sep;18(3):223–54.
17. Mayeda ER, Glymour MM, Quesenberry CP, Whitmer RA. Inequalities in dementia incidence between six racial and ethnic groups over 14 years. *Alzheimers Dement*. 2016 Mar;12(3):216–24.
18. Walsh D, McCartney G, Smith M, Armour G. Relationship between childhood socioeconomic position and adverse childhood experiences (ACEs): a systematic review. *J Epidemiol Community Health*. 2019 Dec;73(12):1087–93.
19. Scarmeas N, Stern Y. Cognitive reserve: Implications for diagnosis and prevention of Alzheimer's disease. *Curr Neurol Neurosci Rep*. 2004 Oct;4(5):374–80.
20. Scarmeas N, Stern Y. Cognitive Reserve and Lifestyle. *J Clin Exp Neuropsychol*. 2003 Aug;25(5):625–33.

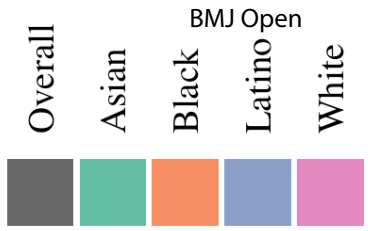

1  
2  
3  
4  
5  
6  
7  
8  
9  
10  
11  
12  
13  
14  
15  
16  
17  
18  
19  
20  
21  
22  
23  
24  
25  
26  
27  
28  
29  
30  
31  
32  
33  
34  
35  
36  
37  
38  
39  
40  
41  
42  
43  
44  
45  
46  
47  
48  
49  
50  
51  
52  
53  
54  
55  
56  
57  
58  
59  
60

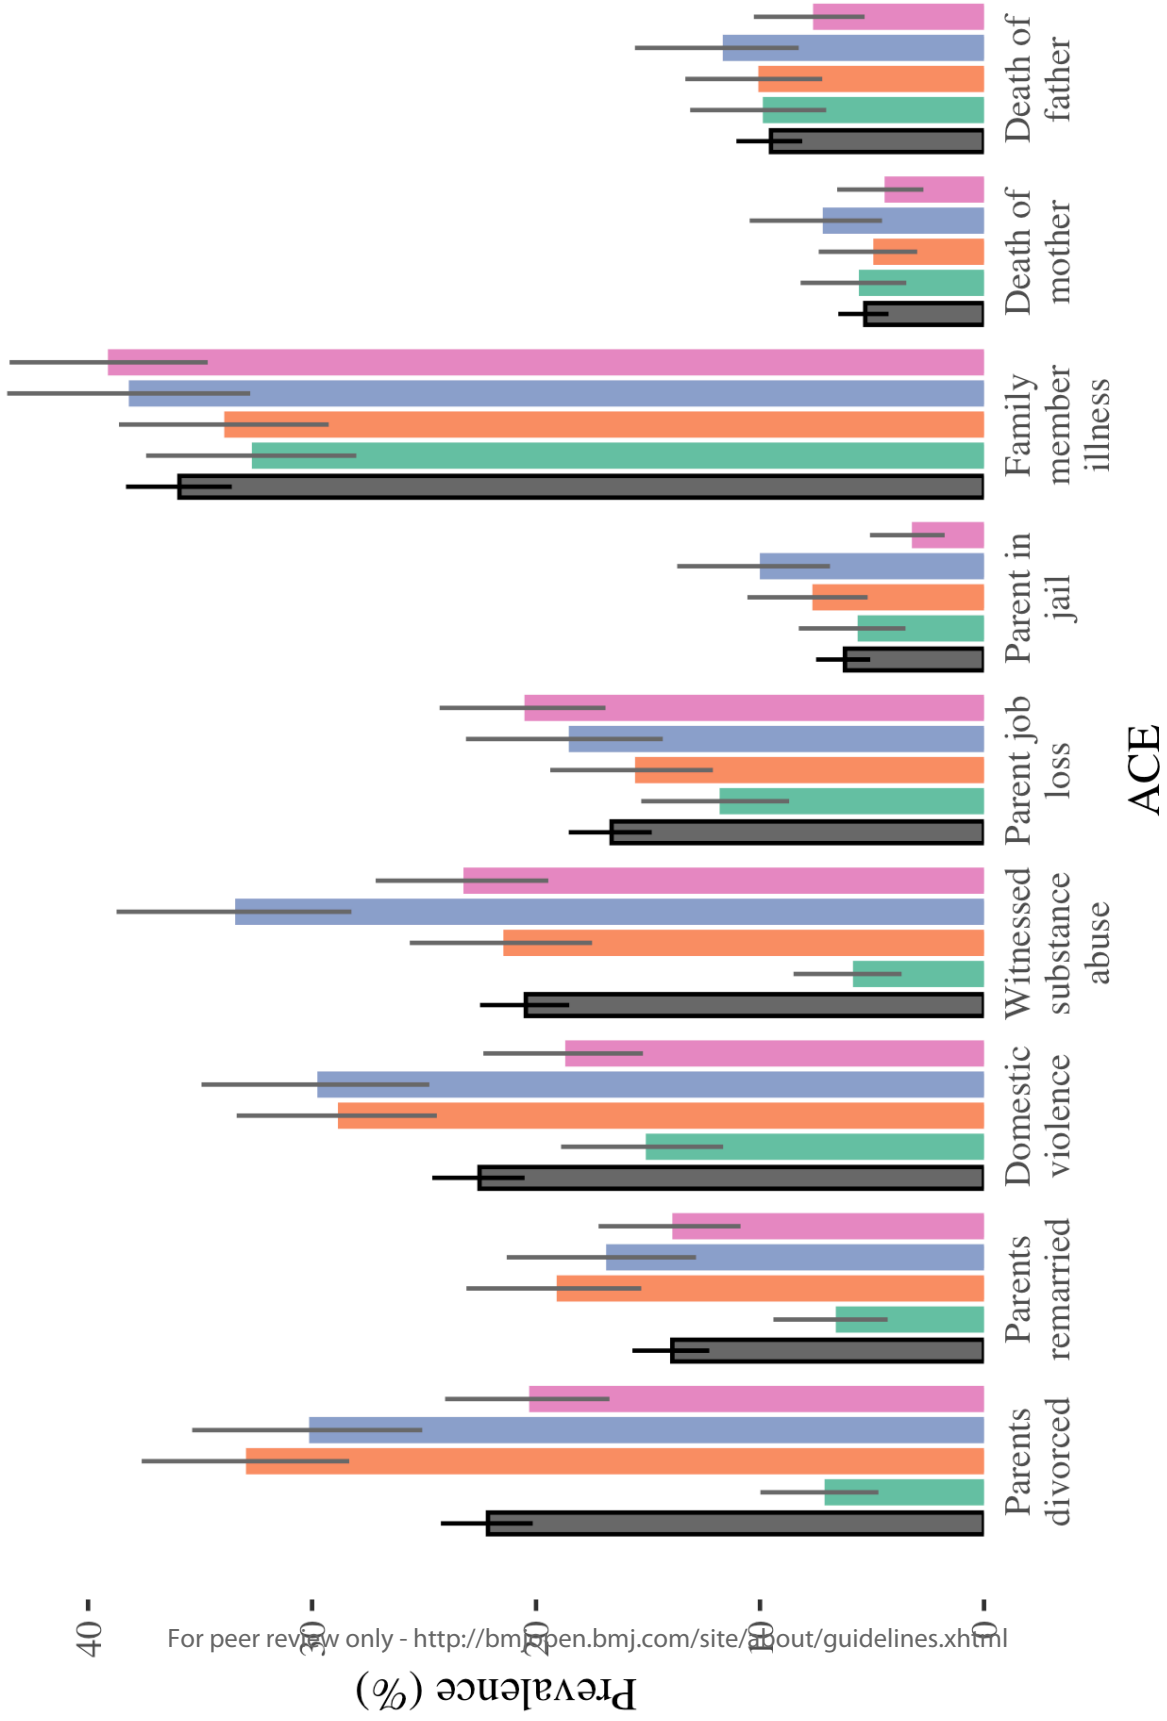

Appendix Table 1. Association of ACEs based on interaction terms between race/ethnicity and ages ACE experienced

|                | Parents<br>divorced    | Parents<br>remarried   | Domestic<br>violence   | Witnessed<br>substance<br>abuse | Parent job<br>loss      | Parent in<br>jail      | Family member<br>illness | Death of<br>mother     | Death of<br>father     |
|----------------|------------------------|------------------------|------------------------|---------------------------------|-------------------------|------------------------|--------------------------|------------------------|------------------------|
|                | $\beta$ (95% CI)       | $\beta$ (95% CI)       | $\beta$ (95% CI)       | $\beta$ (95% CI)                | $\beta$ (95% CI)        | $\beta$ (95% CI)       | $\beta$ (95% CI)         | $\beta$ (95% CI)       | $\beta$ (95% CI)       |
| <b>Black,</b>  |                        |                        |                        |                                 |                         |                        |                          |                        |                        |
| <b>0-6</b>     | 0.23<br>(-0.00, 0.46)  | -0.02<br>(-0.42, 0.37) | 0.12<br>(-0.18, 0.42)  | 0.07<br>(-0.27, 0.41)           | -0.15<br>(-0.59, 0.29)  | -0.31<br>(-1.17, 0.54) | 0.04<br>(-0.26, 0.33)    | -0.05<br>(-0.90, 0.80) | 0.35<br>(-0.17, 0.87)  |
| <b>Black,</b>  |                        |                        |                        |                                 |                         |                        |                          |                        |                        |
| <b>7-12</b>    | -0.13<br>(-0.45, 0.20) | 0.43<br>(0.11, 0.76)   | -0.15<br>(-0.40, 0.11) | 0.09<br>(-0.19, 0.37)           | 0.10<br>(-0.19, 0.40)   | 0.43<br>(-0.14, 0.99)  | 0.00<br>(-0.22, 0.22)    | -0.00<br>(-0.73, 0.73) | -0.49<br>(-1.07, 0.08) |
| <b>Black,</b>  |                        |                        |                        |                                 |                         |                        |                          |                        |                        |
| <b>13-16</b>   | -0.03<br>(-0.53, 0.47) | 0.04<br>(-0.41, 0.49)  | -0.12<br>(-0.62, 0.37) | 0.30<br>(-0.08, 0.69)           | -0.35*<br>(-0.74, 0.03) | 0.43<br>(-0.52, 1.39)  | -0.08<br>(-0.38, 0.22)   | -0.40<br>(-0.97, 0.18) | -0.17<br>(-0.59, 0.26) |
| <b>Latino,</b> |                        |                        |                        |                                 |                         |                        |                          |                        |                        |
| <b>0-6</b>     | 0.28<br>(0.02, 0.53)   | -0.08<br>(-0.48, 0.32) | -0.03<br>(-0.33, 0.26) | -0.10<br>(-0.40, 0.21)          | -0.56<br>(-0.95, -0.17) | -0.05<br>(-0.98, 0.87) | -0.17<br>(-0.47, 0.12)   | 0.15<br>(-0.53, 0.82)  | 0.29<br>(-0.26, 0.84)  |
| <b>Latino,</b> |                        |                        |                        |                                 |                         |                        |                          |                        |                        |
| <b>7-12</b>    | 0.14<br>(-0.21, 0.48)  | 0.43<br>(0.07, 0.80)   | -0.17<br>(-0.45, 0.10) | -0.07<br>(-0.33, 0.20)          | 0.22<br>(-0.09, 0.53)   | 0.18<br>(-0.38, 0.74)  | 0.02<br>(-0.20, 0.24)    | 0.02<br>(-0.76, 0.80)  | -0.25<br>(-0.75, 0.26) |
| <b>Latino,</b> |                        |                        |                        |                                 |                         |                        |                          |                        |                        |
| <b>13-16</b>   | -0.04<br>(-0.55, 0.47) | -0.02<br>(-0.49, 0.44) | -0.31<br>(-0.91, 0.28) | -0.11<br>(-0.50, 0.29)          | 0.00<br>(-0.46, 0.46)   | 0.36<br>(-0.58, 1.29)  | 0.19<br>(-0.13, 0.52)    | -0.10<br>(-0.70, 0.49) | -0.24<br>(-0.75, 0.28) |
| <b>Asian,</b>  |                        |                        |                        |                                 |                         |                        |                          |                        |                        |
|                | 0.34                   | -0.10                  | 0.29                   | 0.31                            | -0.03                   | 0.09                   | 0.06                     | -0.09                  | 0.25                   |

|               |               |                |                |               |               |               |               |               |               |
|---------------|---------------|----------------|----------------|---------------|---------------|---------------|---------------|---------------|---------------|
| <b>0-6</b>    | (-0.03, 0.71) | (-0.68, 0.48)  | (-0.06, 0.64)  | (-0.15, 0.78) | (-0.50, 0.44) | (-0.70, 0.88) | (-0.23, 0.34) | (-0.74, 0.57) | (-0.25, 0.75) |
| <b>Asian,</b> |               |                |                |               |               |               |               |               |               |
|               | -0.05         | 0.28           | 0.05           | 0.34          | 0.31          | 0.40          | 0.08          | -0.10         | -0.45         |
| <b>7-12</b>   | (-0.53, 0.43) | (-0.16, 0.72)  | (-0.26, 0.35)  | (-0.19, 0.86) | (-0.02, 0.64) | (-0.25, 1.06) | (-0.14, 0.30) | (-1.15, 0.95) | (-1.05, 0.14) |
| <b>Asian,</b> |               |                |                |               |               |               |               |               |               |
|               | 0.17          | -0.37          | -0.59          | -0.13         | -0.25         | -0.18         | 0.15          | -0.10         | -0.16         |
| <b>13-16</b>  | (-0.63, 0.97) | (-0.95, 0.22)  | (-1.18, -0.00) | (-0.66, 0.40) | (-0.72, 0.21) | (-1.22, 0.87) | (-0.17, 0.48) | (-0.51, 0.30) | (-0.61, 0.29) |
| <b>White,</b> |               |                |                |               |               |               |               |               |               |
|               | -0.15         | -0.02          | 0.02           | 0.02          | 0.26          | 0.26          | 0.06          | -0.29         | -0.36         |
| <b>0-6</b>    | (-0.32, 0.02) | (-0.31, 0.28)  | (-0.19, 0.24)  | (-0.22, 0.25) | (0.02, 0.50)  | (-0.44, 0.95) | (-0.12, 0.23) | (-0.79, 0.20) | (-0.73, 0.01) |
| <b>White,</b> |               |                |                |               |               |               |               |               |               |
|               | -0.01         | -0.41          | 0.07           | -0.09         | -0.02         | -0.37         | 0.02          | 0.15          | 0.27          |
| <b>7-12</b>   | 0.95          | (-0.65, -0.17) | (-0.12, 0.27)  | (-0.27, 0.09) | (-0.22, 0.17) | (-0.83, 0.09) | (-0.12, 0.16) | (-0.46, 0.76) | (-0.13, 0.68) |
| <b>White,</b> |               |                |                |               |               |               |               |               |               |
|               | 0.15          | 0.04           | 0.03           | -0.12         | 0.27          | -0.27         | -0.02         | -0.32         | 0.10          |
| <b>13-16</b>  | (-0.23, 0.54) | (-0.28, 0.36)  | (-0.33, 0.40)  | (-0.38, 0.15) | (0.01, 0.53)  | (-1.12, 0.59) | (-0.25, 0.20) | (-0.91, 0.27) | (-0.22, 0.42) |

\* All models adjusted for age (linear and quadratic), sex, parental education and race/ethnicity (unless stratified by race/ethnicity).

\*\* All models provide a single coefficient for associations with verbal episodic memory, semantic memory, and executive function, with the exception that coefficients for ACE association with semantic memory among Asian Americans are estimated separately and presented in the supplement.

### Results from Asian and semantic memory omnibus testing

**Appendix Table 2. Regression estimates for the interaction of composite ACE score, race/ethnicity, and the domain of the cognitive measure.**

| Variable                      | Beta Coef.  | Confidence intervals | P-value |
|-------------------------------|-------------|----------------------|---------|
| Composite ACE score*          | 0.01        | (-0.06, 0.08)        | 0.81    |
| Asian executive               | ref         | ref                  |         |
| Asian semantic by ACE score   | 0.13        | (0.04, 0.21)         | 0.00    |
| Asian verbal by ACE score     | 0.00        | (-0.08, 0.08)        | 0.99    |
| Black executive by ACE score  | 0.02        | (-0.08, 0.11)        | 0.71    |
| Black semantic by ACE score   | -0.01       | (-0.10, 0.09)        | 0.92    |
| Black verbal by ACE score     | -0.002      | (-0.10, 0.09)        | 0.97    |
| Latino executive by ACE score | -0.03       | (-0.12, 0.07)        | 0.61    |
| Latino semantic by ACE score  | -0.00       | (-0.10, 0.10)        | 0.99    |
| Latino verbal by ACE score    | -0.01       | (-0.11, 0.09)        | 0.90    |
| White executive by ACE score  | -0.04       | (-0.13, 0.05)        | 0.40    |
| White semantic by ACE score   | -0.02       | (-0.11, 0.07)        | 0.67    |
| White verbal by ACE score     | -0.01       | (-0.10, 0.08)        | 0.87    |
| <b>F-test</b>                 | <b>0.10</b> |                      |         |

\* The main effect of for Composite ACE score refers to the estimate for executive function among Asian American respondents. All other terms refer to the deviation from that effect for the specified racial/ethnic group in the specified cognitive domain. The P-value tests whether that deviation is consistent with the null.

**Appendix Table 3. Final regression model results estimating one effect of composite ACE score on semantic memory among Asian American respondents and another effect for all other racial/ethnic group and cognitive domain combinations.**

| <b>Variables</b>                                                                     | <b>Beta Coef.</b> | <b>Confidence intervals</b> | <b>P-value</b> |
|--------------------------------------------------------------------------------------|-------------------|-----------------------------|----------------|
| Composite score main effect                                                          | 0.01              | (-0.01 , 0.03)              | 0.42           |
| Composite score by indicator for Asian respondents predicting semantic memory domain | -0.03             | (-0.10 , 0.03)              | 0.34           |
| Asian semantic                                                                       | -0.11             | (-0.21 , -0.02)             | 0.02           |
| Asian verbal                                                                         | 0.34              | (0.23 , 0.46)               | <0.00          |
| Black executive                                                                      | -0.31             | (-0.43 , -0.19)             | <0.00          |
| Black semantic                                                                       | -0.56             | (-0.68 , -0.44)             | <0.00          |
| Black verbal                                                                         | -0.20             | (-0.32 , -0.08)             | <0.00          |
| Latino executive                                                                     | -0.06             | (-0.18 , 0.06)              | 0.32           |
| Latino semantic                                                                      | 0.23              | (0.10 , 0.35)               | 0.00           |
| Latino verbal                                                                        | 0.01              | (-0.11 , 0.13)              | 0.89           |
| White executive                                                                      | 0.51              | (0.40 , 0.62)               | <0.01          |
| White semantic                                                                       | 0.61              | (0.50 , 0.72)               | <0.01          |
| White verbal                                                                         | 0.09              | (-0.02 , 0.20)              | 0.11           |



**Appendix Table 4. Mixed effects linear regression coefficients (95% confidence intervals) for the difference in cognitive scores associated with total childhood or age-specific count of ACEs (0 to 4+), overall and stratified by race/ethnicity. [with Asian Semantic Memory]**

|                                 | <b>Total childhood ACEs</b> | <b>Early childhood (0-6 years) ACEs</b> | <b>Middle childhood (7-12 years) ACEs</b> | <b>Adolescent (13-16 years) ACEs</b> |
|---------------------------------|-----------------------------|-----------------------------------------|-------------------------------------------|--------------------------------------|
|                                 | <b><u>Beta (95% CI)</u></b> | <b>Beta (CI)</b>                        | <b>Beta (CI)</b>                          | <b>Beta (CI)</b>                     |
| Full sample                     | 0.01 (-0.01, 0.03)          | 0.01 (-0.03, 0.05)                      | -0.03 (-0.07, 0.01)                       | 0.01 (-0.05, 0.06)                   |
| White                           | 0.00 (-0.04, 0.05)          | 0.01 (-0.05, 0.08)                      | -0.03 (-0.09, 0.03)                       | 0.07 (-0.03, 0.17)                   |
| Black                           | 0.01 (-0.03, 0.05)          | 0.04 (-0.02, 0.10)                      | -0.03 (-0.09, 0.03)                       | -0.01 (-0.09, 0.08)                  |
| Asian-American                  | 0.07 (0.01, 0.14)           | 0.06 (-0.05, 0.17)                      | 0.00 (-0.11, .10)                         | -0.12 (-0.24, 0.00)                  |
| Asian American, Semantic memory | 0.01(-0.06, 0.08)           | 0.05 (-0.06, 0.15)                      | 0.01 (-.09, 0.11)                         | -0.08 (-0.21, 0.04)                  |
| Latino                          | -0.01(-0.06, 0.04)          | -0.04(-0.10, 0.03)                      | -0.01 (-0.08, 0.05)                       | 0.03 (-0.06, 0.13)                   |

**\* All models adjusted for age (linear and quadratic), sex, parental education and race/ethnicity (unless stratified by race/ethnicity).**

**\*\* This table matches Table 2 in the manuscript, with the addition of the coefficients for ACE association with semantic memory among Asian American**

**Table 5. Mixed effects linear regression coefficients (95% confidence intervals) for the difference in memory scores associated with each ACE, overall and stratified by race/ethnicity.**

| ACEs                      | Overall                | White                 | Black                 | Asian                 | Asian, semantic        | Latino                 |
|---------------------------|------------------------|-----------------------|-----------------------|-----------------------|------------------------|------------------------|
| Parents divorced          | -0.03<br>(-0.11,0.04)  | -0.10<br>(-0.24,0.04) | -0.03<br>(-0.15,0.09) | 0.09<br>(-0.16,0.35)  | 0.20<br>(-0.11, 0.52)  | -0.00<br>(-0.14,0.14)  |
| Parents remarried         | -0.11<br>(-0.20,-0.03) | -0.10<br>(-0.26,0.07) | -0.04<br>(-0.18,0.09) | -0.08<br>(-0.34,0.19) | -0.24<br>(-0.57, 0.08) | -0.18<br>(-0.34,-0.03) |
| Domestic violence         | 0.01<br>(-0.06,0.08)   | 0.07<br>(-0.07,0.21)  | -0.00<br>(-0.12,0.12) | 0.19<br>(0.00,0.38)   | -0.02<br>(-0.25, 0.21) | -0.07<br>(-0.21,0.06)  |
| Witnessed substance abuse | -0.06<br>(-0.14,0.01)  | -0.08<br>(-0.21,0.06) | 0.02<br>(-0.11,0.15)  | 0.18<br>(-0.10,0.46)  | -0.04<br>(-0.39, 0.30) | -0.16<br>(-0.29,-0.02) |
| Parent job loss           | 0.04<br>(-0.04,0.11)   | 0.10<br>(-0.04,0.23)  | -0.04<br>(-0.19,0.10) | 0.16<br>(-0.04,0.37)  | 0.08<br>(-0.17, 0.34)  | -0.04<br>(-0.19,0.12)  |
| Parent in jail            | -0.10<br>(-0.21,0.01)  | -0.16<br>(-0.43,0.10) | -0.09<br>(-0.27,0.08) | 0.17<br>(-0.11,0.45)  | -0.16<br>(-0.51, 0.19) | -0.13<br>(-0.32,0.05)  |
| Family member illness     | 0.02<br>(-0.04,0.08)   | 0.06<br>(-0.06,0.17)  | -0.05<br>(-0.17,0.06) | 0.11<br>(-0.04,0.26)  | 0.04<br>(-0.14, 0.22)  | 0.00<br>(-0.12,0.13)   |
| Death of mother           | -0.18<br>(-0.30,-0.07) | -0.10<br>(-0.34,0.14) | -0.15<br>(-0.36,0.06) | -0.19<br>(-0.48,0.10) | -0.54<br>(-0.89,-0.18) | -0.29<br>(-0.49,-0.09) |
| Death of father           | -0.11<br>(-0.20,-0.01) | 0.05<br>(-0.15,0.25)  | -0.14<br>(-0.31,0.03) | -0.10<br>(-0.33,0.12) | -0.08<br>(-0.36, 0.20) | -0.21<br>(-0.39,-0.02) |

**All models adjusted for age (linear and quadratic), sex, parental education, and race/ethnicity (unless stratified by race/ethnicity). \*\* This table matches Table 3 in the manuscript, with the addition of the coefficients for ACE association with semantic memory among Asian American**

1  
2  
3  
4  
5  
6  
7  
8  
9  
10  
11  
12  
13  
14  
15  
16  
17  
18  
19  
20  
21  
22  
23  
24  
25  
26  
27  
28  
29  
30  
31  
32  
33  
34  
35  
36  
37  
38  
39  
40  
41  
42  
43  
44  
45  
46  
47  
48  
49  
50  
51  
52  
53  
54  
55  
56  
57  
58  
59  
60

For peer review only

STROBE Statement—Checklist of items that should be included in reports of *cross-sectional studies*

|                              | Item No | Recommendation                                                                                                                                                                                               | Page No |
|------------------------------|---------|--------------------------------------------------------------------------------------------------------------------------------------------------------------------------------------------------------------|---------|
| <b>Title and abstract</b>    | 1       | (a) Indicate the study's design with a commonly used term in the title or the abstract                                                                                                                       | 2       |
|                              |         | (b) Provide in the abstract an informative and balanced summary of what was done and what was found                                                                                                          | 2       |
| <b>Introduction</b>          |         |                                                                                                                                                                                                              |         |
| Background/rationale         | 2       | Explain the scientific background and rationale for the investigation being reported                                                                                                                         | 3       |
| Objectives                   | 3       | State specific objectives, including any prespecified hypotheses                                                                                                                                             | 3       |
| <b>Methods</b>               |         |                                                                                                                                                                                                              |         |
| Study design                 | 4       | Present key elements of study design early in the paper                                                                                                                                                      | 3       |
| Setting                      | 5       | Describe the setting, locations, and relevant dates, including periods of recruitment, exposure, follow-up, and data collection                                                                              | 3-4     |
| Participants                 | 6       | (a) Give the eligibility criteria, and the sources and methods of selection of participants                                                                                                                  | 3-4     |
| Variables                    | 7       | Clearly define all outcomes, exposures, predictors, potential confounders, and effect modifiers. Give diagnostic criteria, if applicable                                                                     | 4-5     |
| Data sources/<br>measurement | 8*      | For each variable of interest, give sources of data and details of methods of assessment (measurement). Describe comparability of assessment methods if there is more than one group                         | 4-5     |
| Bias                         | 9       | Describe any efforts to address potential sources of bias                                                                                                                                                    | 4-5     |
| Study size                   | 10      | Explain how the study size was arrived at                                                                                                                                                                    | 4       |
| Quantitative variables       | 11      | Explain how quantitative variables were handled in the analyses. If applicable, describe which groupings were chosen and why                                                                                 | 4       |
| Statistical methods          | 12      | (a) Describe all statistical methods, including those used to control for confounding                                                                                                                        | 5       |
|                              |         | (b) Describe any methods used to examine subgroups and interactions                                                                                                                                          | 5       |
|                              |         | (c) Explain how missing data were addressed                                                                                                                                                                  | 5       |
|                              |         | (d) If applicable, describe analytical methods taking account of sampling strategy                                                                                                                           |         |
|                              |         | (e) Describe any sensitivity analyses                                                                                                                                                                        |         |
| <b>Results</b>               |         |                                                                                                                                                                                                              |         |
| Participants                 | 13*     | (a) Report numbers of individuals at each stage of study—eg numbers potentially eligible, examined for eligibility, confirmed eligible, included in the study, completing follow-up, and analysed            | 6       |
|                              |         | (b) Give reasons for non-participation at each stage                                                                                                                                                         |         |
|                              |         | (c) Consider use of a flow diagram                                                                                                                                                                           |         |
| Descriptive data             | 14*     | (a) Give characteristics of study participants (eg demographic, clinical, social) and information on exposures and potential confounders                                                                     | 6       |
|                              |         | (b) Indicate number of participants with missing data for each variable of interest                                                                                                                          |         |
| Outcome data                 | 15*     | Report numbers of outcome events or summary measures                                                                                                                                                         | 6-7     |
| Main results                 | 16      | (a) Give unadjusted estimates and, if applicable, confounder-adjusted estimates and their precision (eg, 95% confidence interval). Make clear which confounders were adjusted for and why they were included | 6-7     |

|                          |    |                                                                                                                                                                            |     |
|--------------------------|----|----------------------------------------------------------------------------------------------------------------------------------------------------------------------------|-----|
|                          |    | (b) Report category boundaries when continuous variables were categorized                                                                                                  |     |
|                          |    | (c) If relevant, consider translating estimates of relative risk into absolute risk for a meaningful time period                                                           |     |
| Other analyses           | 17 | Report other analyses done—eg analyses of subgroups and interactions, and sensitivity analyses                                                                             |     |
| <b>Discussion</b>        |    |                                                                                                                                                                            |     |
| Key results              | 18 | Summarise key results with reference to study objectives                                                                                                                   | 7   |
| Limitations              | 19 | Discuss limitations of the study, taking into account sources of potential bias or imprecision. Discuss both direction and magnitude of any potential bias                 | 7-8 |
| Interpretation           | 20 | Give a cautious overall interpretation of results considering objectives, limitations, multiplicity of analyses, results from similar studies, and other relevant evidence | 7-9 |
| Generalisability         | 21 | Discuss the generalisability (external validity) of the study results                                                                                                      | 8-9 |
| <b>Other information</b> |    |                                                                                                                                                                            |     |
| Funding                  | 22 | Give the source of funding and the role of the funders for the present study and, if applicable, for the original study on which the present article is based              | 9   |

\*Give information separately for exposed and unexposed groups.

**Note:** An Explanation and Elaboration article discusses each checklist item and gives methodological background and published examples of transparent reporting. The STROBE checklist is best used in conjunction with this article (freely available on the Web sites of PLoS Medicine at <http://www.plosmedicine.org/>, Annals of Internal Medicine at <http://www.annals.org/>, and Epidemiology at <http://www.epidem.com/>). Information on the STROBE Initiative is available at [www.strobe-statement.org](http://www.strobe-statement.org).

# BMJ Open

## Are adverse childhood experiences associated with late life cognitive performance across racial/ethnic groups: Results from the Kaiser Healthy Aging and Diverse Life Experiences Study Baseline

|                                 |                                                                                                                                                                                                                                                                                                                                                                                                                                                                                                                                                                                                                                                                                                                                                                                                                                                                                                                                                                       |
|---------------------------------|-----------------------------------------------------------------------------------------------------------------------------------------------------------------------------------------------------------------------------------------------------------------------------------------------------------------------------------------------------------------------------------------------------------------------------------------------------------------------------------------------------------------------------------------------------------------------------------------------------------------------------------------------------------------------------------------------------------------------------------------------------------------------------------------------------------------------------------------------------------------------------------------------------------------------------------------------------------------------|
| Journal:                        | <i>BMJ Open</i>                                                                                                                                                                                                                                                                                                                                                                                                                                                                                                                                                                                                                                                                                                                                                                                                                                                                                                                                                       |
| Manuscript ID                   | bmjopen-2020-042125.R1                                                                                                                                                                                                                                                                                                                                                                                                                                                                                                                                                                                                                                                                                                                                                                                                                                                                                                                                                |
| Article Type:                   | Original research                                                                                                                                                                                                                                                                                                                                                                                                                                                                                                                                                                                                                                                                                                                                                                                                                                                                                                                                                     |
| Date Submitted by the Author:   | 23-Nov-2020                                                                                                                                                                                                                                                                                                                                                                                                                                                                                                                                                                                                                                                                                                                                                                                                                                                                                                                                                           |
| Complete List of Authors:       | Gold, Audra; University of California San Francisco, Department of Epidemiology and Biostatistics<br>Meza, Erika; University of California San Francisco, Department of Epidemiology and Biostatistics<br>Ackley, Sarah ; University of California San Francisco Department of Epidemiology and Biostatistics, Epidemiology and Biostatistics<br>Mungas, Dan; University of California Davis<br>Whitmer, Rachel; University of California Davis; Kaiser Permanente Division of Research<br>Mayeda, Elizabeth Rose; University of California Los Angeles Jonathan and Karin Fielding School of Public Health, Epidemiology<br>Miles, Sunita; Kaiser Permanente Division of Research<br>Eng, Chloe; University of California San Francisco, Epidemiology and Biostatistics<br>Gilsanz, Paola; Kaiser Permanente Division of Research<br>Glymour, M; University of California San Francisco Department of Epidemiology and Biostatistics, Epidemiology and Biostatistics |
| <b>Primary Subject Heading</b>: | Epidemiology                                                                                                                                                                                                                                                                                                                                                                                                                                                                                                                                                                                                                                                                                                                                                                                                                                                                                                                                                          |
| Secondary Subject Heading:      | Public health                                                                                                                                                                                                                                                                                                                                                                                                                                                                                                                                                                                                                                                                                                                                                                                                                                                                                                                                                         |
| Keywords:                       | EPIDEMIOLOGY, Community child health < PAEDIATRICS, Adverse events < THERAPEUTICS                                                                                                                                                                                                                                                                                                                                                                                                                                                                                                                                                                                                                                                                                                                                                                                                                                                                                     |
|                                 |                                                                                                                                                                                                                                                                                                                                                                                                                                                                                                                                                                                                                                                                                                                                                                                                                                                                                                                                                                       |

SCHOLARONE™  
Manuscripts

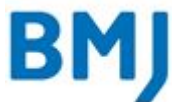

I, the Submitting Author has the right to grant and does grant on behalf of all authors of the Work (as defined in the below author licence), an exclusive licence and/or a non-exclusive licence for contributions from authors who are: i) UK Crown employees; ii) where BMJ has agreed a CC-BY licence shall apply, and/or iii) in accordance with the terms applicable for US Federal Government officers or employees acting as part of their official duties; on a worldwide, perpetual, irrevocable, royalty-free basis to BMJ Publishing Group Ltd ("BMJ") its licensees and where the relevant Journal is co-owned by BMJ to the co-owners of the Journal, to publish the Work in this journal and any other BMJ products and to exploit all rights, as set out in our [licence](#).

The Submitting Author accepts and understands that any supply made under these terms is made by BMJ to the Submitting Author unless you are acting as an employee on behalf of your employer or a postgraduate student of an affiliated institution which is paying any applicable article publishing charge ("APC") for Open Access articles. Where the Submitting Author wishes to make the Work available on an Open Access basis (and intends to pay the relevant APC), the terms of reuse of such Open Access shall be governed by a Creative Commons licence – details of these licences and which [Creative Commons](#) licence will apply to this Work are set out in our licence referred to above.

Other than as permitted in any relevant BMJ Author's Self Archiving Policies, I confirm this Work has not been accepted for publication elsewhere, is not being considered for publication elsewhere and does not duplicate material already published. I confirm all authors consent to publication of this Work and authorise the granting of this licence.



|  |  |  |
|--|--|--|
|  |  |  |
|--|--|--|

1  
2  
3 1 Are adverse childhood experiences associated with late life cognitive performance across racial/ethnic  
4 2 groups: Results from the Kaiser Healthy Aging and Diverse Life Experiences Study Baseline  
5  
6 3

7  
8 4 **Authors:**

9  
10 5 Audra L. Gold<sup>1</sup>, Erika Meza<sup>1</sup>, Sarah F. Ackley<sup>1</sup>, Dan M Mungas<sup>2</sup>, Rachel A Whitmer<sup>2,3</sup>,  
11 6 Elizabeth Rose Mayeda<sup>4</sup>, Sunita Miles<sup>3</sup>, Chloe Eng<sup>1</sup>, Paola Gilsanz<sup>3</sup>, M. Maria Glymour<sup>1</sup>  
12

13 7 <sup>1</sup> Department of Epidemiology and Biostatistics  
14 8 University of California, San Francisco  
15 9

16  
17 10 <sup>2</sup> University of California, Davis  
18

19 11 <sup>3</sup> Kaiser Permanente Division of Research  
20

21 12 <sup>4</sup> Department of Epidemiology  
22 13 University of California, Los Angeles Fielding School of Public Health  
23 14

24 15 Correspondance to:  
25 16 M.Maria Glymour, maria.glymour@ucsf.edu  
26 17 550 16th Street, San Francisco, CA 94158  
27 18  
28 19

29  
30 19 **Text word count: 3,097**  
31  
32 20  
33  
34 21  
35  
36 22  
37  
38 23  
39  
40 24  
41  
42 25  
43  
44 26  
45  
46  
47  
48  
49  
50  
51  
52  
53  
54  
55  
56  
57  
58  
59  
60

|  |  |  |
|--|--|--|
|  |  |  |
|--|--|--|

1  
2  
3 27 **Abstract (word count=222)**  
4

5 28 **Objectives:** Evidence on adverse childhood experiences (ACEs) and late-life cognitive outcomes  
6 29 is inconsistent, with little research among diverse racial/ethnic groups. We investigated whether  
7 30 ACE exposures were associated with worse late-life cognition for all racial/ethnic groups, and at different  
8 31 ages of exposure.

9  
10 32 **Design:** Covariate-adjusted mixed-effects linear regression models estimated associations of (1)  
11 33 total number of ACEs experienced, (2) earliest age when ACE occurred, and (3) type of ACE  
12 34 with overall cognition.

13  
14 35 **Setting:** Kaiser Permanente Northern California (KPNC) members aged 65 years and older,  
15 36 living in Northern California.

16  
17 37 **Participants:** Kaiser Healthy Aging and Diverse Life Experiences study baseline participants,  
18 38 aged 65 years and older (n=1,661; including 403 Asian-American, 338 Latino, 427 Black, and  
19 39 493 White participants).

20  
21 40 **Results:** Most respondents (69%) reported one or more ACE, most frequently family illness  
22 41 (36%), domestic violence (23%), and parental divorce (22%). ACE count was not adversely  
23 42 associated with cognition overall ( $\beta=0.01$ ; 95% CI: -0.01 to 0.03), in any racial/ethnic group, or  
24 43 for any age-category of exposure. Pooling across all race/ethnicities, parent's remarriage ( $\beta=-$   
25 44 0.11; 95% CI: -0.20 to -0.03), mother's death ( $\beta=-0.18$ ; 95% CI: -0.30 to -0.07), and father's  
26 45 death ( $\beta=-0.11$ ; 95% CI: -0.20 to -0.01) were associated with worse cognition.

27  
28 46 **Conclusion:** Adverse childhood exposures overall were not associated with worse cognition in  
29 47 older adults in a diverse sample, although three ACEs were associated with worse cognitive  
30 48 outcomes.  
31  
32  
33  
34

35 49

36  
37 50 **Strengths and limitations of this study**  
38

- 39 51  
40 52  
41 53  
42 54  
43 55  
44 56  
45 57  
46 58  
47 59  
48 60  
49  
50  
51  
52  
53  
54  
55  
56  
57  
58  
59  
60
- Evidence on the effect of ACEs on late-life cognitive performance and decline is mixed, with very little research conducted in populations with substantial racial/ethnic diversity.
  - In the Kaiser Healthy Aging and Diverse Life Experiences cohort, comprising participants aged 65 years and older identifying as Black, Asian-American, Latino, or White, exposure to Adverse Childhood Experiences (ACE) was not associated with worse late-life cognition in any racial/ethnic group, and associations did not differ by age of ACE exposure
  - Only parental remarriage and parental death were consistently associated with worse cognitive outcomes in late life.
  - Primary limitations of the present study include reliance on a cross-sectional sample and self-reported ACEs.

|  |  |  |
|--|--|--|
|  |  |  |
|--|--|--|

## 61 Introduction

62 Adverse childhood experiences (ACEs), such as abuse, violence, and household dysfunction  
63 have lasting harmful impacts on adult physical and mental health,<sup>1-3</sup> but evidence on the effect of  
64 ACEs on late-life cognitive performance and decline is mixed.<sup>4-6</sup> Understanding the links between  
65 ACE exposure and late life cognitive function is critical because low cognitive function, especially  
66 memory, is a strong predictor of risk of dementia, mortality, institutionalization, self-rated health, and  
67 disability, among other health outcomes.<sup>1,4,7-9</sup> Prior studies indicate heterogeneities in the association  
68 of ACEs and cognitive outcomes by age of exposure, type of ACE, race/ethnicity, and sources of  
69 resilience. For example, Ravona-Springer (2012) found that death of a parent during childhood  
70 was associated with substantially higher risk of dementia when the experience occurred between  
71 the ages of 0 and 6, but the excess dementia risk attenuated the older the age of ACE exposure.  
72 Additional findings suggest that while some ACEs appear to adversely affect late-life cognitive  
73 functioning, other ACEs predict better cognitive outcomes.<sup>6,10</sup>

74 Both exposure to and consequences of ACEs may differ by race/ethnicity. Significant racial and  
75 ethnic differences in the prevalence of ACEs as well as between types of adversities have been  
76 documented.<sup>11</sup> To date, there has been only one multi-racial study evaluating ACEs and  
77 cognition: Barnes et al found no association between early-life adverse events and cognitive  
78 decline in Whites, while early-life food deprivation was associated with better cognitive  
79 outcomes for African Americans.<sup>4</sup> No other studies have directly compared effects across  
80 racial/ethnic groups.

81 We investigated the association of ACEs with later-life cognitive performance in the Kaiser  
82 Healthy Aging and Diverse Life Experiences (KHANDLE) cohort. We hypothesized that ACE  
83 exposure would predict worse late-life cognition for all racial/ethnic groups, with the largest  
84 effects associated with experiences when aged 0-6 years.

## 85 Methods:

### 86 Study participants and data collection

87 We used baseline data from the Kaiser Healthy Aging and Diverse Life Experiences  
88 (KHANDLE) cohort, which comprises community-dwelling older adults residing in the San  
89 Francisco Bay and Sacramento areas of California. KHANDLE aims to evaluate how  
90 race/ethnicity and life course health and sociocultural factors influence late-life brain health and  
91 cognitive decline. Individuals eligible for KHANDLE: were long-term members of Kaiser  
92 Permanente Northern California, an integrated healthcare delivery system; were age 65 years or  
93 older on January 1, 2017; spoke English or Spanish; and had previously participated in Kaiser  
94 Permanente multiphasic health checkup exams between 1964-1985. Stratified random sampling  
95 by race/ethnicity and educational attainment was used with the goal of recruiting approximately  
96 equal proportions of Asian, Black, Latino, and White participants and achieving diversity in  
97 educational attainment. Exclusion criteria included: electronic medical record diagnosis of  
98 dementia or other neurodegenerative disease (frontotemporal dementia, Lewy body disease,  
99 Pick's disease, Parkinson's disease with dementia, Huntington's disease); and presence of health  
100 conditions that would impede participation in study interviews, defined by hospice activity in the  
101 past 12 months, history of severe chronic obstructive pulmonary disease in the past 6 months,

|  |  |  |
|--|--|--|
|  |  |  |
|--|--|--|

1  
2  
3 102 congestive heart failure hospitalizations in the past 6 months, and history of end stage renal  
4 103 disease or dialysis in the past 12 months. At baseline, 1,712 individuals were enrolled.  
5 104 Individuals who self-identified as Native Americans (n=3) or refused to self-identify  
6 105 race/ethnicity (n=1) were dropped from the sample used in this analysis. After excluding 13  
7 106 individuals who were missing all cognitive measures used in this analysis and 34 individuals  
8 107 missing all ACEs, the final analytic sample size was 1,661. All respondents provided informed  
9 108 consent and completed an interview in English or Spanish either in-home or at a Kaiser  
10 109 Permanente Facility (approximately 40% of baseline interviews were conducted at a facility and  
11 110 60% in-home).

12 111  
13 112 Kaiser Permanente Northern California (KPNC) is a large, integrated healthcare delivery system  
14 113 that provides comprehensive medical care to over 4 million members.<sup>12</sup> Prior work indicated the  
15 114 member population was generally representative of the overall regional population, though  
16 115 individuals at extreme tails of the income distribution were underrepresented.<sup>13-15</sup> The KPNC  
17 116 older adult population (aged 65+) are generally similar to the population of seniors residing in  
18 117 Northern California with respect to medical history of chronic conditions, including diabetes,  
19 118 hypertension, heart disease, and asthma, and lifestyle factors, including smoking, obesity, and  
20 119 sedentary lifestyle.<sup>15</sup>

## 21 120 **Measures**

22 121 Our cognitive outcomes are standardized scores from the following three cognitive domains:  
23 122 verbal episodic memory, semantic memory, and executive functioning. These scores were  
24 123 obtained from the Spanish and English Neuropsychological Assessment Scales (SENAS), which  
25 124 was given to all participants in their preferred language (English or Spanish).<sup>16</sup> The SENAS is a  
26 125 battery of cognitive tests that has previously undergone extensive development for valid  
27 126 comparisons of cognition across racial/ethnic and linguistically diverse groups. Verbal episodic  
28 127 memory composite scores were derived from a multiracial word-list-learning test. Semantic  
29 128 memory composite scores were derived from verbal (object-naming) and nonverbal (picture  
30 129 association) tests. Executive function composite scores were obtained using component tasks of  
31 130 category fluency, phonemic (letter) fluency, and working memory (digit-span backward, visual-  
32 131 span backward, list sorting). Details of the administration procedures, development, and  
33 132 psychometric characteristics have been extensively described in previous publications.<sup>16</sup>  
34 133 Analyses used cognitive data for everyone who had cognitive measures for at least one of the  
35 134 three cognitive domains.

36 135  
37 136 KHANDLE fielded a modified version of the assessment of ACEs used in the Reasons for  
38 137 Geographic and Racial Disparities in Stroke (REGARDS) cohort.<sup>17</sup> Participants were asked  
39 138 aloud by the interviewer if they had experienced each of 9 ACEs when they were age 16 or  
40 139 younger: parents were divorced or separated; parents remarried; witnessed domestic violence;  
41 140 substance abuse by a family member; loss of a job by a parent; parent had to go to jail; serious  
42 141 illness of a family member; death of mother; and death of father. If any ACE was experienced,  
43 142 respondents were asked the youngest age at which they experienced the event. A composite ACE  
44 143 score was constructed as a count of the number ever experienced, with the scores ranging from 0  
45 144 if no ACE had been experienced to 9 if every ACE had been experienced. For individuals  
46 145 missing one or more ACE item, we imputed the values to the average of the total observed ACEs

|  |  |  |
|--|--|--|
|  |  |  |
|--|--|--|

146 for that individual (i.e., if the individual responded to 6 ACE items and endorsed 3 of them, the  
147 values of the missing 3 items were imputed to 0.5). Since few people reported more than 4 ACEs  
148 (n=161), the count of ACEs was top coded at 4 for our analyses. Age-specific ACEs were  
149 constructed as the count of the number of experiences reported as first occurring in specific age  
150 categories (0-6, 7-12, and 13-16).

151 Because ACEs are experienced in early life, there are few plausible confounders that might  
152 influence both ACEs and late-life cognitive outcomes. All models were either adjusted for or  
153 stratified by race/ethnicity (classified as Black, White, Latino, or Asian). All models were also  
154 adjusted for linear and quadratic terms for year of age over 65 at cognitive assessment, sex, and  
155 parental education. Parental educational attainment was reported by the respondent as highest  
156 level of education completed. Maternal and paternal education for primary and secondary  
157 education was coded as number of years of primary or secondary education, ranging from 0 to  
158 12. We additionally adjusted for parental higher education as a continuous predictor: 0=no higher  
159 education; 1=some college but no degree or associates degree; 2=bachelor's degree, master's  
160 degree or other higher education. If values for parental education were missing (n=276 and  
161 n=417 missing for maternal and paternal, respectively) they were coded as 0 (lowest category),  
162 and we additionally adjusted for an indicator variable for missingness.

#### 164 **Statistical Analysis:**

165 Baseline variables gender, race/ethnicity, and parental education were tabulated by ACE  
166 composite score. The prevalence of each ACE was estimated for the entire sample and stratified  
167 by race/ethnicity.

168 If the effect of ACEs were the same for all three domains of cognition, it would be most efficient  
169 to estimate a single mixed model including each individual's three outcome assessments (verbal  
170 memory, semantic memory, and executive function) and derive a single effect estimate  
171 applicable to all domains. This added efficiency is especially important when estimating  
172 race/ethnicity specific effects where sample sizes are smaller. Before estimating such a model,  
173 we first had to assess whether it was appropriate to estimate a single effect of ACE exposure on  
174 all three cognitive domains within each racial/ethnic group.

175 In initial models, we therefore tested for domain-specific effects of composite ACE score on  
176 cognition for each racial/ethnic group. To do this, we used a mixed-effects linear regression  
177 model with the three standardized cognitive domains as outcomes with random intercepts to  
178 account for within-person correlation between cognitive domains. All models were controlled for  
179 indicators of cognitive domain (e.g., verbal memory or semantic memory, with executive  
180 function treated as the reference outcome), allowing for the possibility that average score differs  
181 between domains. We also included interactions between race/ethnicity and domain (allowing  
182 for the possibility that domain differences vary by race/ethnicity) and interactions between each  
183 person's composite ACE score and each race/ethnicity-domain combination (allowing for the  
184 possibility that the effect of ACE exposure differs for any combination of race/ethnicity and  
185 cognitive domain). An F-test for the null hypothesis that the race/ethnicity-specific ACE  
186 associations with cognition varied significantly across domains indicated evidence of



|  |  |  |
|--|--|--|
|  |  |  |
|--|--|--|

187 heterogeneity ( $P=0.09$ ). When we evaluated individual comparisons, we found one significant  
188 domain-specific difference: the association between ACE score and semantic memory among  
189 Asian American respondents. For both other domains in Asian Americans and for all domains in  
190 the other three racial/ethnic groups, the statistical tests indicated estimation of a single parameter  
191 for estimated effects of ACEs on cognition was appropriate. In all subsequent models,  
192 interactions between Asian American, semantic memory, and the ACE measure were included to  
193 estimate the association of ACEs with semantic memory among Asian Americans separately  
194 from all other associations. In these models, the coefficient for the ACE measure can be  
195 interpreted as the association of ACEs with cognition, averaged across domains (results are very  
196 similar to what would be obtained if the different domains were averaged in advance and treated  
197 as a single outcome) except excluding the effect of ACEs on semantic memory among Asian  
198 Americans. Associations between ACE exposure and semantic memory among Asian American  
199 respondents are reported in Appendix tables 1-4.

200 We then used covariate-adjusted linear mixed models to estimate the association of composite  
201 ACE score with cognition in pooled analyses and in models stratified by race-ethnicity. To  
202 evaluate whether differences in coefficients between racial/ethnic groups were statistically  
203 significant, we incorporated race/ethnicity by ACE score interactions and used an F-test. Because  
204 of limited prior evidence on racial/ethnic specific associations, we present these even when the  
205 F-test indicated no evidence of statistically significant heterogeneity.

206 Covariate adjusted mixed-effects linear regression models were also estimated to evaluate the  
207 association between composite ACE scores at specific age categories (0-6, 7-12, and 13-16) and  
208 cognition for the full sample and in models stratified by race/ethnicity.

209 Finally, we evaluated the association of each of the 9 individual ACEs and standardized  
210 cognitive score and whether these associations differed by race/ethnicity or by age ranges of  
211 exposure (0-6; 7-12; 13-16). Results for age-specific associations with individual ACE exposures  
212 are given in the Appendix table 5.

213 Analyses were conducted using STATA SE 15 (STATA Corporation, College Station, TX,  
214 2003).

## 215 Results

216 Among the 1,661 participants enrolled in the KHANDLE baseline, 69% reported experiencing at  
217 least one ACE prior to age 16: 448 individuals (27%) reported experiencing 1 ACE; 336 (20%)  
218 reported 2 ACEs; 203 (12%) reported 3 ACEs, and 161 (10%) reported 4+ ACEs (Table 1).

219 Among the 9 individual ACEs, illness in the family had the highest overall prevalence at 36%,  
220 followed by domestic violence (23%), and parental divorce (22%) (Figure 1). Both the  
221 distribution of total ACE score and the prevalence of each specific ACE varied by race/ethnicity.

222 In covariate-adjusted mixed-effects linear regression models, there was no association between  
223 the composite ACE score and standardized cognition when considering all racial/ethnic groups in  
224 a pooled analysis ( $\beta = 0.01$ ; 95% CI, -0.01 to 0.03) (Table 2). Age-specific ACE exposures were  
225 not significantly associated with cognition (ACE scores ages 0-6,  $\beta = 0.01$ ; 95% CI, -0.03 to 0.05;

|  |  |  |
|--|--|--|
|  |  |  |
|--|--|--|

226 ACE scores ages 7-12,  $\beta = -0.03$ ; 95% CI, -0.07 to 0.01; or ACE score ages 13-16,  $\beta = 0.01$ ;  
227 95% CI, -0.05 to 0.06) (Table 2). When evaluating the association between total ACE score and  
228 cognition for each racial/ethnic group, the only apparent association was for Asian Americans,  
229 among whom each unit increase in the composite ACE was associated with better cognitive  
230 scores (estimated association based on verbal memory and executive function,  $\beta = 0.07$ ; 95% CI,  
231 0.01 to 0.14). Although this individual race-specific association was statistically significant, the  
232 overall test for differences in the association of ACE composite score and cognition across  
233 racial/ethnic groups was not significant ( $p=0.13$ ) after excluding the single Asian-semantic  
234 memory comparison.

235 Interactions between race/ethnicity and age-specific ACE exposures were also non-significant.  
236 There was no evidence of associations between age-specific ACE exposures and cognition  
237 overall, although Asian Americans exposed to ACEs age 13-16 averaged worse cognition  $\beta =$   
238 0.12; 95% CI, -0.24 to 0.00) (Table 2).

239 Pooling across all race/ethnicities, three types of ACE exposures were associated with worse  
240 cognition: parent remarried; death of mother; and death of a father (Table 3). Although there  
241 were some differences in the associations of individual ACEs with standardized cognition  
242 between racial/ethnic groups, differences were consistent with chance (i.e., the tests of  
243 heterogeneity in the ACE associations with cognition across racial/ethnic groups were not  
244 statistically significant). Patterns were generally similar when evaluating cognition based on  
245 indicator variables for age of first exposure overall and race/ethnicity (Appendix Table 1).

## 246 Discussion

247 Retrospectively reported exposure to childhood ACEs was prevalent in a sample of long-term  
248 elderly Kaiser Permanente Northern California (KPNC) members, but ACEs were not associated  
249 with cognition in later-life among White, Black, or Latino respondents. Results were similar for  
250 total ACE count and ACE exposures during age groups categorized as 0-6, 7-12, and 13-16.  
251 Among Asian American respondents, higher ACE count was associated with slightly better overall  
252 cognition, albeit a difference too small to be of notable clinical significance. Among the individual  
253 ACEs, three experiences were associated with significantly worse cognition when pooling across  
254 all racial/ethnic groups, but when examining each racial/ethnic group separately, point estimates  
255 indicated adverse associations only for parents remarried and death of a mother (albeit with wide  
256 confidence intervals in racial/ethnic group specific estimates). For other ACEs, associations were  
257 inconsistent and, in several instances, positive. All racial/ethnic differences in ACE by cognition  
258 associations were consistent with chance.

259 Our finding of no association between overall ACE count and cognition is surprising in light of  
260 prior evidence that ACEs influence multiple domains of adult physical health.<sup>1,18</sup> Early life stress  
261 predicts both hippocampus and amygdala development in children as well as children's cognitive and  
262 affective functioning.<sup>19-21</sup> However, children's responses to such adversity are very heterogeneous, and  
263 both social and genetic factors may ameliorate or outweigh the effects of adversity as a child matures.<sup>22</sup>  
264 However, prior findings in early work on ACEs and cognition has been mixed and has been  
265 conducted in predominantly White samples. Very few prior studies include multi-racial samples  
266 or assessments with both age-specific ACE exposure and late-life cognitive outcomes. This is



|  |  |  |
|--|--|--|
|  |  |  |
|--|--|--|

267 important to evaluate because race/ethnicity is strongly associated with economic, social,  
268 political, and environmental factors that influence cognitive aging. These factors may modify the  
269 consequences of ACEs for cognition in late life or may create selection processes such that only  
270 especially resilient individuals survive to late life. For example, increased exposure to extreme  
271 adversity across the lifecourse may blunt the special relevance of childhood adversity among  
272 racial/ethnic minorities in the United States.

273 Our findings do suggest that parental remarriage and parental death are associated with worse  
274 cognitive outcomes in late life. The exposures were common, especially for racial/ethnic  
275 minorities. The importance of these experiences over other adversities may imply the special  
276 relevance of a child being separated from the parent.

277 Prior studies have documented significant racial and ethnic differences in the prevalence of total  
278 ACEs as well as between types of adversity, such as incarceration of a family member versus  
279 domestic violence, in the U.S.<sup>11</sup> ACEs are strongly patterned by socioeconomic status and  
280 neighborhood context.<sup>23</sup> Barnes et al reported that in a cohort of 6,105 older African Americans  
281 and Whites followed for up to 16 years, there was no association between early life adverse  
282 events and rate of cognitive decline in Whites, while food deprivation and being thinner than  
283 average in early life were associated with better cognitive outcomes for African Americans.<sup>4</sup>  
284 Food deprivation is not commonly used in ACE surveys and was not included in the KHANDLE  
285 baseline survey.

286 Although point estimates for the effects of ACEs among Whites were generally more adverse  
287 than for other racial/ethnic groups, only for Asian American did we find evidence of a  
288 statistically significant difference. Among Asian Americans, higher ACE count was associated  
289 with better overall cognition. It is difficult to theorize how ACEs might enhance later life  
290 cognition. The positive association observed among older Asian Americans may be due to  
291 chance, selective survival, or differential recall. Especially among Asian Americans in the  
292 KHANDLE sample, many of whom were born outside the US, individuals who have migrated,  
293 survived to late life, and enrolled in the study may be an extraordinarily resilient group. This type  
294 of selection could lead to inverse associations if both ACE exposure and other determinants of  
295 late life cognition influence the process that leads to study enrollment. Chance is also a plausible  
296 explanation, as indicated by the non-significant F-test for heterogeneity between racial/ethnic  
297 groups.

298 The limitations of the present study include reliance on a cross-sectional sample and self-  
299 reporting ACEs. This precludes evaluating within-person cognitive decline and increases  
300 vulnerability to confounding. However, confounding seems unlikely to account for the largely  
301 null results reported here. Several different ACE assessment instruments, reflecting different  
302 levels of trauma, are currently in use across the field. The survey used in KHANDLE does not  
303 include questions about neglect, physical, or sexual abuse, rather, it focuses on household  
304 dysfunction questions. Our null findings with the 9 ACEs assessed in KHANDLE do not rule out  
305 the relevance of other ACEs that are more severe. Finally, sample size is an important limitation,  
306 although for the overall and race-specific estimates of composite ACE score and cognition  
307 associations, confidence intervals were fairly narrow and inconsistent with especially large

|  |  |  |
|--|--|--|
|  |  |  |
|--|--|--|

308 benefits or harms. KHANDLE is, to our knowledge, the only available community-based study  
309 with information on the four largest racial/ethnic groups represented in the US and rigorous  
310 cognitive assessments in older adults. We have reported finely grained results to facilitate future  
311 meta-analyses. This study did not directly address dementia because the participants were  
312 screened at baseline to be free of dementia. Differences in cognitive performance in late life are  
313 relevant for anticipating dementia risk, however, because of the established importance of  
314 cognitive reserve.<sup>24,25</sup> Understanding early life determinants of cognition in older age is important  
315 because cognitive function is predictive of myriad health outcomes, including physical health and  
316 functional independence as well as dementia.<sup>1,7-9,26</sup> Our findings, therefore, if taken at face value,  
317 suggest these ACEs may not have major relevance for subsequent dementia risk.

318 Our results suggest that previously reported findings linking ACEs to cognitive outcomes in late  
319 life may be over-estimated or may not hold in many communities. These findings should be  
320 interpreted cautiously until replicated in additional multi-ethnic samples. Given the robust  
321 evidence of early life experiences overall for cognitive reserve and dementia risk, these results  
322 would suggest a focus on other aspects of childhood, such as material deprivation or educational  
323 experiences.

324 **Figure 1 caption:** Grey vertical line segments indicate exact binomial confidence intervals

325 **Competing interests:** authors declare no competing interests.

326  
327 **Funding:** This work was supported by the National Institutes of Health grant numbers  
328 RF1AG052132, R00AG053410, R01AG066132, T32AG049663, and RF1AG055486.

329  
330 **Author contributions:** AG, EM, SA, DM, RW, ERM, PG, and MMG were involved with the  
331 study design, data collection, data analysis, and reporting the results. SM and CE were involved  
332 with the data collection, data analysis, and reporting the results. All authors revised it critically  
333 for important intellectual content. All authors approved the final version of the manuscript, and  
334 agree to be accountable for all aspect of the work.

335  
336 **Patient and public involvement:** Patients and/or the public were not involved in the design, or  
337 conduct, or reporting, or dissemination plans of this research.

338  
339 **Patient consent for publication:** Not required.

340  
341 **Ethics Approval:** Ethical approval was granted by the Kaiser Permanente Northern California  
342 Institutional Review Board (IRB Number: CN-16-2786).

343  
344 **Data availability statement:** De-identified data are available to qualified investigators from the  
345 KHANDLE Leadership Committee upon approval for the purposes of replicating procedures and  
346 results.

347  
348

1  
2  
3 349  
4  
5 350  
6  
7 351  
8  
9  
10  
11  
12  
13  
14  
15  
16  
17  
18  
19  
20  
21  
22  
23  
24  
25  
26  
27  
28  
29  
30  
31  
32  
33  
34  
35  
36  
37  
38  
39  
40  
41  
42  
43  
44  
45  
46 352  
47  
48 353  
49  
50 354  
51  
52 355  
53  
54 356  
55  
56 357  
57  
58  
59  
60

|  |  |  |
|--|--|--|
|  |  |  |
|--|--|--|

**Table 1: Descriptive Statistics, KHANDLE Cohort**

| Variable                      | Level                                                     | Composite ACE Score |                |                |                |                |
|-------------------------------|-----------------------------------------------------------|---------------------|----------------|----------------|----------------|----------------|
|                               |                                                           | 0                   | 1              | 2              | 3              | 4+             |
| <b>N</b>                      | 1,661                                                     | 513<br>(100%)       | 448<br>(100%)  | 336<br>(100%)  | 203<br>(100%)  | 161<br>(100%)  |
| <b>Age (years), mean (SD)</b> | 76.0 (6.8)                                                | 75.7<br>(6.6)       | 76.6<br>(6.9)  | 76.1<br>(6.9)  | 76.0<br>(6.7)  | 74.6<br>(6.4)  |
| <b>Gender</b>                 | Female                                                    | 223<br>(43.5%)      | 182<br>(40.6%) | 133<br>(39.6%) | 74<br>(36.5%)  | 63<br>(39.1%)  |
|                               | Male                                                      | 290<br>(56.5%)      | 266<br>(59.4%) | 203<br>(60.4%) | 129<br>(63.5%) | 98<br>(60.9%)  |
| <b>Race/Ethnicity</b>         | Asian                                                     | 181<br>(35.3%)      | 111<br>(24.8%) | 68<br>(20.2%)  | 29<br>(14.3%)  | 14<br>(8.7%)   |
|                               | Black                                                     | 105<br>(20.5%)      | 116<br>(25.9%) | 92<br>(27.4%)  | 66<br>(32.5%)  | 48<br>(29.8%)  |
|                               | Latino                                                    | 71<br>(13.8%)       | 82<br>(18.3%)  | 85<br>(25.3%)  | 51<br>(25.1%)  | 49<br>(30.4%)  |
|                               | White                                                     | 156<br>(30.4%)      | 139<br>(31.0%) | 91<br>(27.1%)  | 57<br>(28.1%)  | 50<br>(31.1%)  |
| <b>Maternal education</b>     | Mean years of education among those with <=12 years, (SD) | 8.46<br>(4.73)      | 7.76<br>(4.87) | 7.78<br>(4.74) | 7.98<br>(5.00) | 7.83<br>(4.76) |
|                               | Some college but no degree/ associates degree             | 59<br>(11.5%)       | 51<br>(11.4%)  | 38<br>(11.3%)  | 25<br>(12.3%)  | 14<br>(8.7%)   |
|                               | Bachelor's or more                                        | 63<br>(12.3%)       | 34<br>(7.6%)   | 32<br>(9.5%)   | 18<br>(8.9%)   | 10<br>(6.2%)   |
| <b>Paternal education</b>     | Mean years of education among those with <=12 years, (SD) | 8.51<br>(4.75)      | 7.29<br>(5.16) | 6.82<br>(5.36) | 6.19<br>(5.21) | 6.53<br>(5.45) |
|                               | Some college but no degree/ associates degree             | 60<br>(11.7%)       | 43<br>(9.6%)   | 32<br>(9.5%)   | 21<br>(10.3%)  | 12<br>(7.5%)   |
|                               | Bachelor's or more                                        | 110<br>(21.4%)      | 70<br>(15.6%)  | 46<br>(13.7%)  | 14<br>(6.9%)   | 15<br>(9.3%)   |

|  |  |  |
|--|--|--|
|  |  |  |
|--|--|--|

358

For peer review only

1  
2  
3  
4  
5  
6  
7  
8  
9  
10  
11  
12  
13  
14  
15  
16  
17  
18  
19  
20  
21  
22  
23  
24  
25  
26  
27  
28  
29  
30  
31  
32  
33  
34  
35  
36  
37  
38  
39  
40  
41  
42  
43  
44  
45  
46  
47  
48  
49  
50  
51  
52  
53  
54  
55  
56  
57  
58  
59  
60

|  |  |  |
|--|--|--|
|  |  |  |
|--|--|--|

**Table 2. Mixed-effects linear regression coefficients (95% confidence intervals) for the difference in cognitive scores associated with total childhood or age-specific count of ACEs (0 to 4+), overall and stratified by race/ethnicity.**

|                                                                                       | <b>Total childhood ACEs</b>        | <b>Early childhood (0-6 years) ACEs</b> | <b>Middle childhood (7-12 years) ACEs</b> | <b>Adolescent (13-16 years) ACEs</b> |
|---------------------------------------------------------------------------------------|------------------------------------|-----------------------------------------|-------------------------------------------|--------------------------------------|
|                                                                                       | <b><math>\beta</math> (95% CI)</b> | <b><math>\beta</math> (CI)</b>          | <b><math>\beta</math> (CI)</b>            | <b><math>\beta</math> (CI)</b>       |
| Full sample                                                                           | 0.01 (-0.01, 0.03)                 | 0.01 (-0.03, 0.05)                      | -0.03 (-0.07, 0.01)                       | 0.01 (-0.05, 0.06)                   |
| White                                                                                 | 0.00 (-0.04, 0.05)                 | 0.01 (-0.05, 0.08)                      | -0.03 (-0.09, 0.03)                       | 0.07 (-0.03, 0.17)                   |
| Black                                                                                 | 0.01 (-0.03, 0.05)                 | 0.04 (-0.02, 0.10)                      | -0.03 (-0.09, 0.03)                       | -0.01 (-0.09, 0.08)                  |
| Asian-American                                                                        | 0.07 (0.01, 0.14)                  | 0.06 (-0.05, 0.17)                      | 0.00 (-0.11, 0.10)                        | -0.12 (-0.24, 0.00)                  |
| Latino                                                                                | -0.01(-0.06, 0.04)                 | -0.04(-0.10, 0.03)                      | -0.01 (-0.08, 0.05)                       | 0.03 (-0.06, 0.13)                   |
| P-value from an F-test for interaction between ACE composite score and race/ethnicity | 0.13                               | 0.17                                    | 0.26                                      | 0.80                                 |

\* All models adjusted for age (linear and quadratic), sex, parental education and race/ethnicity (unless stratified by race/ethnicity).

\*\* All models provide a single coefficient for associations with verbal episodic memory, semantic memory, and executive function, with the exception of the coefficients for ACE association with semantic memory among Asian Americans, which are estimated separately and presented in the supplement.

**Table 3. Mixed effects linear regression coefficients (95% confidence intervals) for the difference in memory scores associated with each ACE, overall and stratified by race/ethnicity.**

| ACEs                      | Overall                 | White                  | Black                  | Asian                  | Latino                  | P-value for interaction with race/ethnicity** |
|---------------------------|-------------------------|------------------------|------------------------|------------------------|-------------------------|-----------------------------------------------|
|                           | $\beta$ (95% CI)        | $\beta$ (95% CI)       | $\beta$ (95% CI)       | $\beta$ (95% CI)       | $\beta$ (95% CI)        |                                               |
| Parents divorced          | -0.03<br>(-0.11, 0.04)  | -0.10<br>(-0.24, 0.04) | -0.03<br>(-0.15, 0.09) | 0.09<br>(-0.16, 0.35)  | -0.00<br>(-0.14, 0.14)  | 0.20                                          |
| Parents remarried         | -0.11<br>(-0.20, -0.03) | -0.10<br>(-0.26, 0.07) | -0.04<br>(-0.18, 0.09) | -0.08<br>(-0.34, 0.19) | -0.18<br>(-0.34, -0.03) | 0.74                                          |
| Domestic violence         | 0.01<br>(-0.06, 0.08)   | 0.07<br>(-0.07, 0.21)  | -0.00<br>(-0.12, 0.12) | 0.19<br>(0.00, 0.38)   | -0.07<br>(-0.21, 0.06)  | 0.11                                          |
| Witnessed substance abuse | -0.06<br>(-0.14, 0.01)  | -0.08<br>(-0.21, 0.06) | 0.02<br>(-0.11, 0.15)  | 0.18<br>(-0.10, 0.46)  | -0.16<br>(-0.29, -0.02) | 0.05                                          |
| Parent job loss           | 0.04<br>(-0.04, 0.11)   | 0.10<br>(-0.04, 0.23)  | -0.04<br>(-0.19, 0.10) | 0.16<br>(-0.04, 0.37)  | -0.04<br>(-0.19, 0.12)  | 0.26                                          |
| Parent in jail            | -0.10<br>(-0.21, 0.01)  | -0.16<br>(-0.43, 0.10) | -0.09<br>(-0.27, 0.08) | 0.17<br>(-0.11, 0.45)  | -0.13<br>(-0.32, 0.05)  | 0.29                                          |
| Family member illness     | 0.02<br>(-0.04, 0.08)   | 0.06<br>(-0.06, 0.17)  | -0.05<br>(-0.17, 0.06) | 0.11<br>(-0.04, 0.26)  | 0.00<br>(-0.12, 0.13)   | 0.29                                          |
| Death of mother           | -0.18<br>(-0.30, -0.07) | -0.10<br>(-0.34, 0.14) | -0.15<br>(-0.36, 0.06) | -0.19<br>(-0.48, 0.10) | -0.29<br>(-0.49, -0.09) | 0.67                                          |
| Death of father           | -0.11<br>(-0.20, -0.01) | 0.05<br>(-0.15, 0.25)  | -0.14<br>(-0.31, 0.03) | -0.10<br>(-0.33, 0.12) | -0.21<br>(-0.39, -0.02) | 0.55                                          |

\* All models adjusted for age (linear and quadratic), sex, parental education, and race/ethnicity (unless stratified by race/ethnicity).

\*\*P values reflect the F-test of the interaction between individual ACEs and race/ethnicity

\*\*\* All models provide a single coefficient for associations with verbal episodic memory, semantic memory, and executive function, with the exception that coefficients for ACE association with semantic memory among Asian Americans are estimated separately and presented in the supplement

## References

1. Felitti VJ, Anda RF, Nordenberg D, Williamson DF, Spitz AM, Edwards V, et al. Relationship of Childhood Abuse and Household Dysfunction to Many of the Leading Causes of Death in Adults. *Am J Prev Med.* 1998 May;14(4):245–58.
2. Anda RF, Felitti VJ, Bremner JD, Walker JD, Whitfield Ch, Perry BD, et al. The enduring effects of abuse and related adverse experiences in childhood: A convergence of evidence from neurobiology and epidemiology. *Eur Arch Psychiatry Clin Neurosci.* 2006 Apr;256(3):174–86.
3. Baglivio M, Swartz, Kimberly, Huq, Mona Sayedul, Sheer, Amy, Hardt, Nancy. The Prevalence of Adverse Childhood Experiences (ACE) in the Lives of Juvenile Offenders. 2014;
4. Barnes LL, Wilson RS, Everson-Rose SA, Hayward MD, Evans DA, Mendes de Leon CF. Effects of early-life adversity on cognitive decline in older African Americans and whites. *Neurology.* 2012 Dec 11;79(24):2321–7.
5. Korten NCM, Penninx BWJH, Pot AM, Deeg DJH, Comijs HC. Adverse Childhood and Recent Negative Life Events: Contrasting Associations With Cognitive Decline in Older Persons. *J Geriatr Psychiatry Neurol.* 2014 Jun;27(2):128–38.
6. Ritchie K, Jaussent I, Stewart R, Dupuy A-M, Courtet P, Malafosse A, et al. Adverse childhood environment and late-life cognitive functioning: Childhood adversity and late-life cognition. *Int J Geriatr Psychiatry.* 2011 May;26(5):503–10.
7. Villarejo A, Bermejo-Pareja F, Trincado R, Olazarán J, Benito-León J, Rodríguez C, et al. Memory impairment in a simple recall task increases mortality at 10 years in non-demented elderly. *Int J Geriatr Psychiatry.* 2011 Feb;26(2):182–7.
8. Luppá M, Luck T, Weyerer S, König H-H, Brahler E, Riedel-Heller SG. Prediction of institutionalization in the elderly. A systematic review. *Age Ageing.* 2010 Jan 1;39(1):31–8.
9. Wagner DC, Short JL. Longitudinal predictors of self-rated health and mortality in older adults. *Prev Chronic Dis.* 2014 Jun 5;11:E93.
10. Ravona-Springer R, Beeri MS, Goldbourt U. Younger Age at Crisis Following Parental Death in Male Children and Adolescents Is Associated With Higher Risk for Dementia at Old Age: *Alzheimer Dis Assoc Disord.* 2012;26(1):68–73.
11. Mersky JP, Janczewski CE. Racial and ethnic differences in the prevalence of adverse childhood experiences: Findings from a low-income sample of U.S. women. *Child Abuse Negl.* 2018 Feb;76:480–7.
12. Klein NP, Fireman B, Goddard K, Zerbo O, Asher J, Zhou J, et al. Vaccine effectiveness of cell-culture relative to egg-based inactivated influenza vaccine during the 2017-18 influenza season. Huber VC, editor. *PLOS ONE.* 2020 Feb 26;15(2):e0229279.



|  |  |  |
|--|--|--|
|  |  |  |
|--|--|--|

13. Gordon NP, Kaplan GA. Some evidence refuting the HMO “favorable selection” hypothesis: the case of Kaiser Permanente. *Adv Health Econ Health Serv Res.* 1991;12:19–39.
14. Krieger N. Overcoming the absence of socioeconomic data in medical records: validation and application of a census-based methodology. *Am J Public Health.* 1992 May;82(5):703–10.
15. Gordon NP. Similarity of the Kaiser Permanente Senior Member Population in Northern California to the Non-Kaiser Permanente Covered and General Population of Seniors in Northern California: Statistics from the 2009 California Health Interview Survey. Kaiser Permanente Northern California Division of Research; 2012.
16. Mungas D, Reed BR, Crane PK, Haan MN, González H. Spanish and English Neuropsychological Assessment Scales (SENAS): Further Development and Psychometric Characteristics. *Psychol Assess.* 2004 Dec;16(4):347–59.
17. Howard VJ, McClure LA, Glymour MM, Cunningham SA, Kleindorfer DO, Crowe M, et al. Effect of duration and age at exposure to the Stroke Belt on incident stroke in adulthood. *Neurology.* 2013 Apr 30;80(18):1655–61.
18. Anda RF, Dong M, Brown DW, Felitti VJ, Giles WH, Perry GS, et al. The relationship of adverse childhood experiences to a history of premature death of family members. *BMC Public Health.* 2009 Dec;9(1):106.
19. Pechtel P, Pizzagalli DA. Effects of early life stress on cognitive and affective function: an integrated review of human literature. *Psychopharmacology (Berl).* 2011 Mar;214(1):55–70.
20. Ivy AS, Rex CS, Chen Y, Dube C, Maras PM, Grigoriadis DE, et al. Hippocampal Dysfunction and Cognitive Impairments Provoked by Chronic Early-Life Stress Involve Excessive Activation of CRH Receptors. *J Neurosci.* 2010 Sep 29;30(39):13005–15.
21. Oh DL, Jerman P, Silvério Marques S, Koita K, Purewal Boparai SK, Burke Harris N, et al. Systematic review of pediatric health outcomes associated with childhood adversity. *BMC Pediatr.* 2018 Dec;18(1):83.
22. Howell KH, Miller-Graff LE. Protective factors associated with resilient functioning in young adulthood after childhood exposure to violence. *Child Abuse Negl.* 2014 Dec;38(12):1985–94.
23. Walsh D, McCartney G, Smith M, Armour G. Relationship between childhood socioeconomic position and adverse childhood experiences (ACEs): a systematic review. *J Epidemiol Community Health.* 2019 Dec;73(12):1087–93.
24. Scarmeas N, Stern Y. Cognitive reserve: Implications for diagnosis and prevention of Alzheimer’s disease. *Curr Neurol Neurosci Rep.* 2004 Oct;4(5):374–80.



|  |  |  |
|--|--|--|
|  |  |  |
|--|--|--|

- 1
- 2
- 3
- 4 25. Scarmeas N, Stern Y. Cognitive Reserve and Lifestyle. J Clin Exp Neuropsychol. 2003
- 5 Aug;25(5):625–33.
- 6
- 7 26. Barnes DE, Covinsky KE, Whitmer RA, Kuller LH, Lopez OL, Yaffe K. Predicting risk of
- 8 dementia in older adults: The late-life dementia risk index. Neurology. 2009 Jul
- 9 21;73(3):173–9.
- 10
- 11
- 12
- 13
- 14
- 15
- 16
- 17
- 18
- 19
- 20
- 21
- 22
- 23
- 24
- 25
- 26
- 27
- 28
- 29
- 30
- 31
- 32
- 33
- 34
- 35
- 36
- 37
- 38
- 39
- 40
- 41
- 42
- 43
- 44
- 45
- 46
- 47
- 48
- 49
- 50
- 51
- 52
- 53
- 54
- 55
- 56
- 57
- 58
- 59
- 60

For peer review only

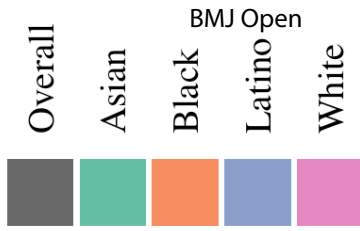

1  
2  
3  
4  
5  
6  
7  
8  
9  
10  
11  
12  
13  
14  
15  
16  
17  
18  
19  
20  
21  
22  
23  
24  
25  
26  
27  
28  
29  
30  
31  
32  
33  
34  
35  
36  
37  
38  
39  
40  
41  
42  
43  
44  
45  
46  
47  
48  
49  
50  
51  
52  
53  
54  
55  
56  
57  
58  
59  
60

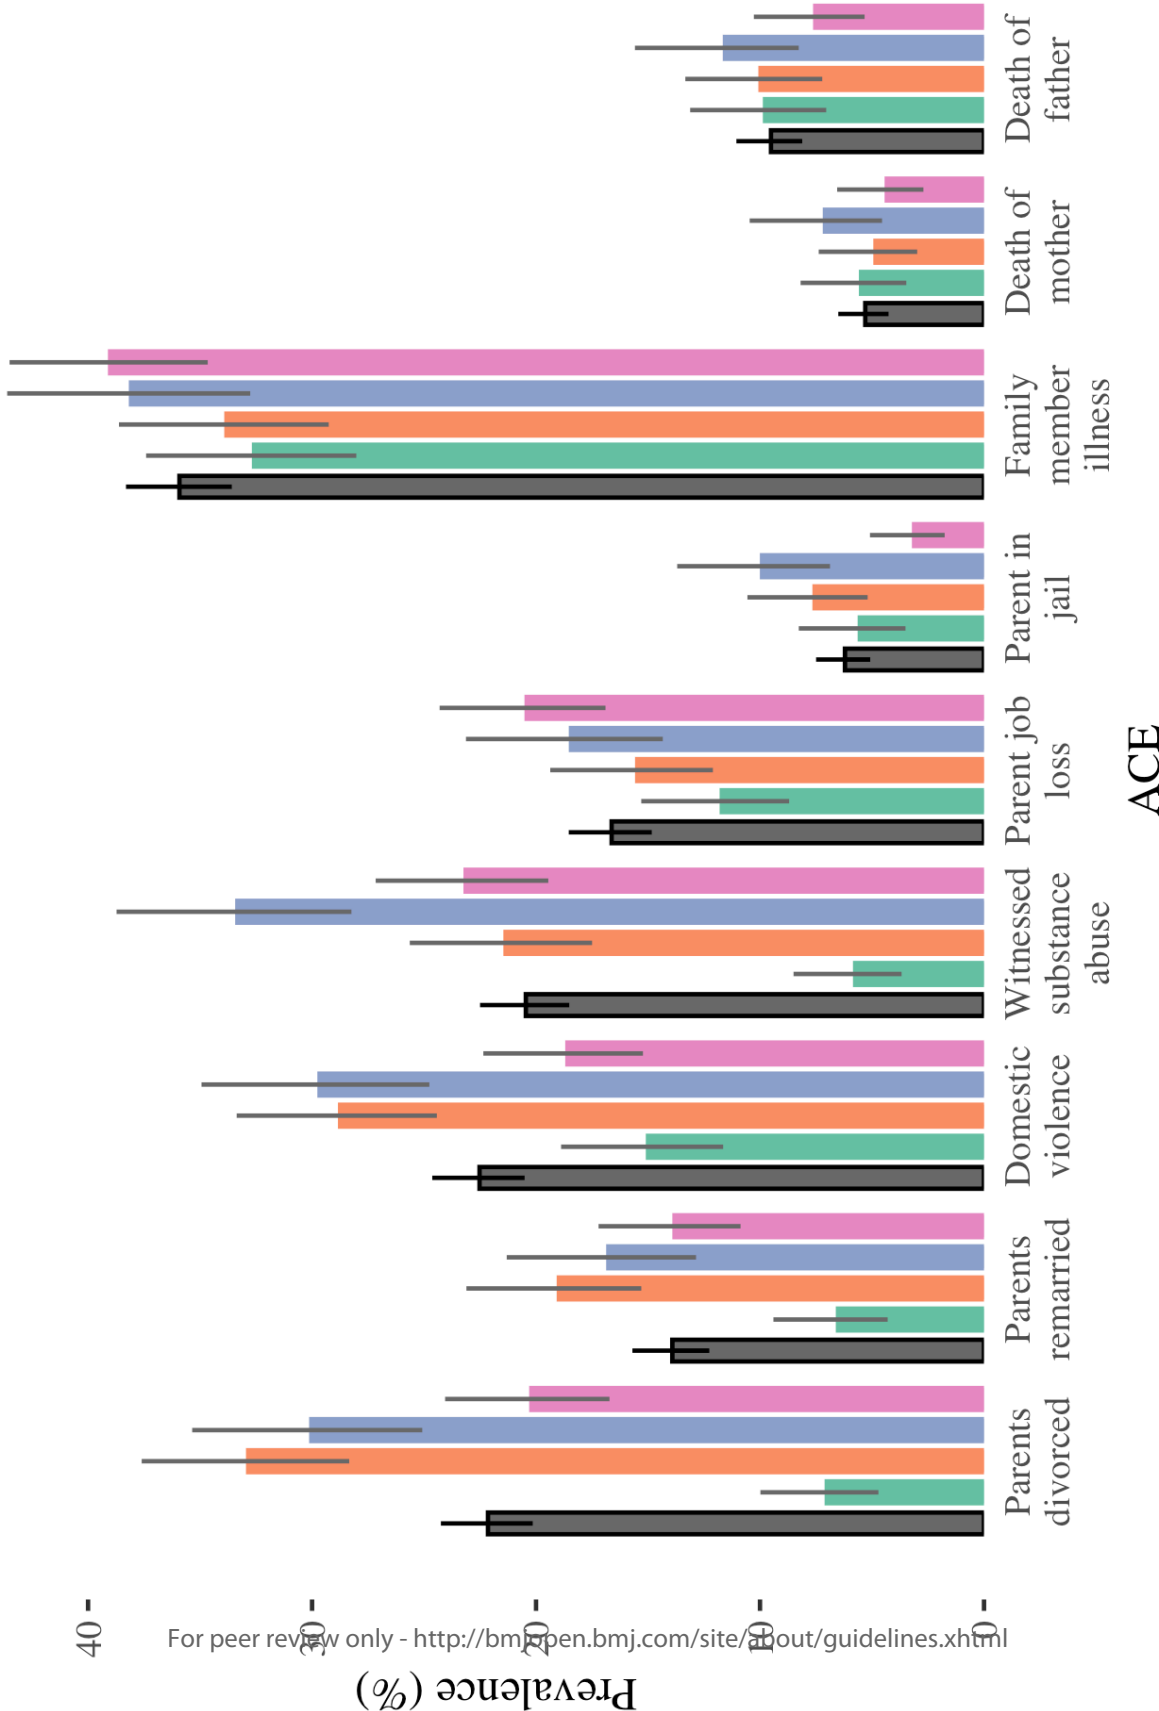

Prevalence (%)

## Results from Asian and semantic memory omnibus testing

**Appendix Table 1. Regression estimates for the interaction of composite ACE score, race/ethnicity, and the domain of the cognitive measure.**

| Variable                      | Beta Coef.  | Confidence intervals | P-value |
|-------------------------------|-------------|----------------------|---------|
| Composite ACE score*          | 0.01        | (-0.06, 0.08)        | 0.81    |
| Asian executive               | ref         | ref                  |         |
| Asian semantic by ACE score   | 0.13        | (0.04, 0.21)         | 0.00    |
| Asian verbal by ACE score     | 0.00        | (-0.08, 0.08)        | 0.99    |
| Black executive by ACE score  | 0.02        | (-0.08, 0.11)        | 0.71    |
| Black semantic by ACE score   | -0.01       | (-0.10, 0.09)        | 0.92    |
| Black verbal by ACE score     | -0.002      | (-0.10, 0.09)        | 0.97    |
| Latino executive by ACE score | -0.03       | (-0.12, 0.07)        | 0.61    |
| Latino semantic by ACE score  | -0.00       | (-0.10, 0.10)        | 0.99    |
| Latino verbal by ACE score    | -0.01       | (-0.11, 0.09)        | 0.90    |
| White executive by ACE score  | -0.04       | (-0.13, 0.05)        | 0.40    |
| White semantic by ACE score   | -0.02       | (-0.11, 0.07)        | 0.67    |
| White verbal by ACE score     | -0.01       | (-0.10, 0.08)        | 0.87    |
| <b>F-test</b>                 | <b>0.10</b> |                      |         |

\* The main effect of for Composite ACE score refers to the estimate for executive function among Asian American respondents. All other terms refer to the deviation from that effect for the specified racial/ethnic group in the specified cognitive domain. The P-value tests whether that deviation is consistent with the null.

**Appendix Table 2. Final regression model results estimating one effect of composite ACE score on semantic memory among Asian American respondents and another effect for all other racial/ethnic group and cognitive domain combinations.**

| <b>Variables</b>                                                                     | <b>Beta Coef.</b> | <b>Confidence intervals</b> | <b>P-value</b> |
|--------------------------------------------------------------------------------------|-------------------|-----------------------------|----------------|
| Composite score main effect                                                          | 0.01              | (-0.01 , 0.03)              | 0.42           |
| Composite score by indicator for Asian respondents predicting semantic memory domain | -0.03             | (-0.10 , 0.03)              | 0.34           |
| Asian semantic                                                                       | -0.11             | (-0.21 , -0.02)             | 0.02           |
| Asian verbal                                                                         | 0.34              | (0.23 , 0.46)               | <0.00          |
| Black executive                                                                      | -0.31             | (-0.43 , -0.19)             | <0.00          |
| Black semantic                                                                       | -0.56             | (-0.68 , -0.44)             | <0.00          |
| Black verbal                                                                         | -0.20             | (-0.32 , -0.08)             | <0.00          |
| Latino executive                                                                     | -0.06             | (-0.18 , 0.06)              | 0.32           |
| Latino semantic                                                                      | 0.23              | (0.10 , 0.35)               | 0.00           |
| Latino verbal                                                                        | 0.01              | (-0.11 , 0.13)              | 0.89           |
| White executive                                                                      | 0.51              | (0.40 , 0.62)               | <0.01          |
| White semantic                                                                       | 0.61              | (0.50 , 0.72)               | <0.01          |
| White verbal                                                                         | 0.09              | (-0.02 , 0.20)              | 0.11           |

**Appendix Table 3. Mixed effects linear regression coefficients (95% confidence intervals) for the difference in cognitive scores associated with total childhood or age-specific count of ACEs (0 to 4+), overall and stratified by race/ethnicity. [with Asian Semantic Memory]**

|                                 | <b>Total childhood ACEs</b> | <b>Early childhood (0-6 years) ACEs</b> | <b>Middle childhood (7-12 years) ACEs</b> | <b>Adolescent (13-16 years) ACEs</b> |
|---------------------------------|-----------------------------|-----------------------------------------|-------------------------------------------|--------------------------------------|
|                                 | <b><u>Beta (95% CI)</u></b> | <b>Beta (CI)</b>                        | <b>Beta (CI)</b>                          | <b>Beta (CI)</b>                     |
| Full sample                     | 0.01 (-0.01, 0.03)          | 0.01 (-0.03, 0.05)                      | -0.03 (-0.07, 0.01)                       | 0.01 (-0.05, 0.06)                   |
| White                           | 0.00 (-0.04, 0.05)          | 0.01 (-0.05, 0.08)                      | -0.03 (-0.09, 0.03)                       | 0.07 (-0.03, 0.17)                   |
| Black                           | 0.01 (-0.03, 0.05)          | 0.04 (-0.02, 0.10)                      | -0.03 (-0.09, 0.03)                       | -0.01 (-0.09, 0.08)                  |
| Asian-American                  | 0.07 (0.01, 0.14)           | 0.06 (-0.05, 0.17)                      | 0.00 (-0.11, .10)                         | -0.12 (-0.24, 0.00)                  |
| Asian American, Semantic memory | 0.01(-0.06, 0.08)           | 0.05 (-0.06, 0.15)                      | 0.01 (-.09, 0.11)                         | -0.08 (-0.21, 0.04)                  |
| Latino                          | -0.01(-0.06, 0.04)          | -0.04(-0.10, 0.03)                      | -0.01 (-0.08, 0.05)                       | 0.03 (-0.06, 0.13)                   |

**\* All models adjusted for age (linear and quadratic), sex, parental education and race/ethnicity (unless stratified by race/ethnicity).**

**\*\* This table matches Table 2 in the manuscript, with the addition of the coefficients for ACE association with semantic memory among Asian American**

**Table 4. Mixed effects linear regression coefficients (95% confidence intervals) for the difference in memory scores associated with each ACE, overall and stratified by race/ethnicity.**

| ACEs                      | Overall                | White                 | Black                 | Asian                 | Asian, semantic          | Latino                 |
|---------------------------|------------------------|-----------------------|-----------------------|-----------------------|--------------------------|------------------------|
| Parents divorced          | -0.03<br>(-0.11,0.04)  | -0.10<br>(-0.24,0.04) | -0.03<br>(-0.15,0.09) | 0.09<br>(-0.16,0.35)  | 0.20<br>(-0.11, 0.52)    | -0.00<br>(-0.14,0.14)  |
| Parents remarried         | -0.11<br>(-0.20,-0.03) | -0.10<br>(-0.26,0.07) | -0.04<br>(-0.18,0.09) | -0.08<br>(-0.34,0.19) | -0.24<br>(-0.57, 0.08)   | -0.18<br>(-0.34,-0.03) |
| Domestic violence         | 0.01<br>(-0.06,0.08)   | 0.07<br>(-0.07,0.21)  | -0.00<br>(-0.12,0.12) | 0.19<br>(0.00,0.38)   | -0.02<br>(-0.25, 0.21)   | -0.07<br>(-0.21,0.06)  |
| Witnessed substance abuse | -0.06<br>(-0.14,0.01)  | -0.08<br>(-0.21,0.06) | 0.02<br>(-0.11,0.15)  | 0.18<br>(-0.10,0.46)  | -0.04<br>(-0.39, 0.30)   | -0.16<br>(-0.29,-0.02) |
| Parent job loss           | 0.04<br>(-0.04,0.11)   | 0.10<br>(-0.04,0.23)  | -0.04<br>(-0.19,0.10) | 0.16<br>(-0.04,0.37)  | 0.08<br>(-0.17, 0.34)    | -0.04<br>(-0.19,0.12)  |
| Parent in jail            | -0.10<br>(-0.21,0.01)  | -0.16<br>(-0.43,0.10) | -0.09<br>(-0.27,0.08) | 0.17<br>(-0.11,0.45)  | -0.16<br>(-0.51, 0.19)   | -0.13<br>(-0.32,0.05)  |
| Family member illness     | 0.02<br>(-0.04,0.08)   | 0.06<br>(-0.06,0.17)  | -0.05<br>(-0.17,0.06) | 0.11<br>(-0.04,0.26)  | 0.04<br>(-0.14, 0.22)    | 0.00<br>(-0.12,0.13)   |
| Death of mother           | -0.18<br>(-0.30,-0.07) | -0.10<br>(-0.34,0.14) | -0.15<br>(-0.36,0.06) | -0.19<br>(-0.48,0.10) | -0.54<br>(-0.89,-,-0.18) | -0.29<br>(-0.49,-0.09) |
| Death of father           | -0.11<br>(-0.20,-0.01) | 0.05<br>(-0.15,0.25)  | -0.14<br>(-0.31,0.03) | -0.10<br>(-0.33,0.12) | -0.08<br>(-0.36, 0.20)   | -0.21<br>(-0.39,-0.02) |

**All models adjusted for age (linear and quadratic), sex, parental education, and race/ethnicity (unless stratified by race/ethnicity). \*\* This table matches Table 3 in the manuscript, with the addition of the coefficients for ACE association with semantic memory among Asian American**

**Appendix Table 5. Association of ACEs based on interaction terms between race/ethnicity and ages ACE experienced**

|                          | Parents<br>divorced    | Parents<br>remarried   | Domestic<br>violence    | Witnessed<br>substance<br>abuse | Parent job<br>loss      | Parent in<br>jail      | Family member<br>illness | Death of<br>mother     | Death of<br>father     |
|--------------------------|------------------------|------------------------|-------------------------|---------------------------------|-------------------------|------------------------|--------------------------|------------------------|------------------------|
|                          | $\beta$ (95% CI)       | $\beta$ (95% CI)       | $\beta$ (95% CI)        | $\beta$ (95% CI)                | $\beta$ (95% CI)        | $\beta$ (95% CI)       | $\beta$ (95% CI)         | $\beta$ (95% CI)       | $\beta$ (95% CI)       |
| <b>Black,<br/>0-6</b>    | 0.23<br>(-0.00, 0.46)  | -0.02<br>(-0.42, 0.37) | 0.12<br>(-0.18, 0.42)   | 0.07<br>(-0.27, 0.41)           | -0.15<br>(-0.59, 0.29)  | -0.31<br>(-1.17, 0.54) | 0.04<br>(-0.26, 0.33)    | -0.05<br>(-0.90, 0.80) | 0.35<br>(-0.17, 0.87)  |
| <b>Black,<br/>7-12</b>   | -0.13<br>(-0.45, 0.20) | 0.43<br>(0.11, 0.76)   | -0.15<br>(-0.40, 0.11)  | 0.09<br>(-0.19, 0.37)           | 0.10<br>(-0.19, 0.40)   | 0.43<br>(-0.14, 0.99)  | 0.00<br>(-0.22, 0.22)    | -0.00<br>(-0.73, 0.73) | -0.49<br>(-1.07, 0.08) |
| <b>Black,<br/>13-16</b>  | -0.03<br>(-0.53, 0.47) | 0.04<br>(-0.41, 0.49)  | -0.12<br>(-0.62, 0.37)  | 0.30<br>(-0.08, 0.69)           | -0.35*<br>(-0.74, 0.03) | 0.43<br>(-0.52, 1.39)  | -0.08<br>(-0.38, 0.22)   | -0.40<br>(-0.97, 0.18) | -0.17<br>(-0.59, 0.26) |
| <b>Latino,<br/>0-6</b>   | 0.28<br>(0.02, 0.53)   | -0.08<br>(-0.48, 0.32) | -0.03<br>(-0.33, 0.26)  | -0.10<br>(-0.40, 0.21)          | -0.56<br>(-0.95, -0.17) | -0.05<br>(-0.98, 0.87) | -0.17<br>(-0.47, 0.12)   | 0.15<br>(-0.53, 0.82)  | 0.29<br>(-0.26, 0.84)  |
| <b>Latino,<br/>7-12</b>  | 0.14<br>(-0.21, 0.48)  | 0.43<br>(0.07, 0.80)   | -0.17<br>(-0.45, 0.10)  | -0.07<br>(-0.33, 0.20)          | 0.22<br>(-0.09, 0.53)   | 0.18<br>(-0.38, 0.74)  | 0.02<br>(-0.20, 0.24)    | 0.02<br>(-0.76, 0.80)  | -0.25<br>(-0.75, 0.26) |
| <b>Latino,<br/>13-16</b> | -0.04<br>(-0.55, 0.47) | -0.02<br>(-0.49, 0.44) | -0.31<br>(-0.91, 0.28)  | -0.11<br>(-0.50, 0.29)          | 0.00<br>(-0.46, 0.46)   | 0.36<br>(-0.58, 1.29)  | 0.19<br>(-0.13, 0.52)    | -0.10<br>(-0.70, 0.49) | -0.24<br>(-0.75, 0.28) |
| <b>Asian,<br/>0-6</b>    | 0.34<br>(-0.03, 0.71)  | -0.10<br>(-0.68, 0.48) | 0.29<br>(-0.06, 0.64)   | 0.31<br>(-0.15, 0.78)           | -0.03<br>(-0.50, 0.44)  | 0.09<br>(-0.70, 0.88)  | 0.06<br>(-0.23, 0.34)    | -0.09<br>(-0.74, 0.57) | 0.25<br>(-0.25, 0.75)  |
| <b>Asian,<br/>7-12</b>   | -0.05<br>(-0.53, 0.43) | 0.28<br>(-0.16, 0.72)  | 0.05<br>(-0.26, 0.35)   | 0.34<br>(-0.19, 0.86)           | 0.31<br>(-0.02, 0.64)   | 0.40<br>(-0.25, 1.06)  | 0.08<br>(-0.14, 0.30)    | -0.10<br>(-1.15, 0.95) | -0.45<br>(-1.05, 0.14) |
| <b>Asian,<br/>13-16</b>  | 0.17<br>(-0.63, 0.97)  | -0.37<br>(-0.95, 0.22) | -0.59<br>(-1.18, -0.00) | -0.13<br>(-0.66, 0.40)          | -0.25<br>(-0.72, 0.21)  | -0.18<br>(-1.22, 0.87) | 0.15<br>(-0.17, 0.48)    | -0.10<br>(-0.51, 0.30) | -0.16<br>(-0.61, 0.29) |



|               |               |                |               |               |               |               |               |               |               |
|---------------|---------------|----------------|---------------|---------------|---------------|---------------|---------------|---------------|---------------|
| <b>White,</b> | -0.15         | -0.02          | 0.02          | 0.02          | 0.26          | 0.26          | 0.06          | -0.29         | -0.36         |
| <b>0-6</b>    | (-0.32, 0.02) | (-0.31, 0.28)  | (-0.19, 0.24) | (-0.22, 0.25) | (0.02, 0.50)  | (-0.44, 0.95) | (-0.12, 0.23) | (-0.79, 0.20) | (-0.73, 0.01) |
| <b>White,</b> | -0.01         | -0.41          | 0.07          | -0.09         | -0.02         | -0.37         | 0.02          | 0.15          | 0.27          |
| <b>7-12</b>   | 0.95          | (-0.65, -0.17) | (-0.12, 0.27) | (-0.27, 0.09) | (-0.22, 0.17) | (-0.83, 0.09) | (-0.12, 0.16) | (-0.46, 0.76) | (-0.13, 0.68) |
| <b>White,</b> | 0.15          | 0.04           | 0.03          | -0.12         | 0.27          | -0.27         | -0.02         | -0.32         | 0.10          |
| <b>13-16</b>  | (-0.23, 0.54) | (-0.28, 0.36)  | (-0.33, 0.40) | (-0.38, 0.15) | (0.01, 0.53)  | (-1.12, 0.59) | (-0.25, 0.20) | (-0.91, 0.27) | (-0.22, 0.42) |

\* All models adjusted for age (linear and quadratic), sex, parental education and race/ethnicity (unless stratified by race/ethnicity).

\*\* All models provide a single coefficient for associations with verbal episodic memory, semantic memory, and executive function, with the exception that coefficients for ACE association with semantic memory among Asian Americans are estimated separately and presented in the supplement.

STROBE Statement—Checklist of items that should be included in reports of *cross-sectional studies*

|                              | Item No | Recommendation                                                                                                                                                                                               | Page No |
|------------------------------|---------|--------------------------------------------------------------------------------------------------------------------------------------------------------------------------------------------------------------|---------|
| <b>Title and abstract</b>    | 1       | (a) Indicate the study's design with a commonly used term in the title or the abstract                                                                                                                       | 2       |
|                              |         | (b) Provide in the abstract an informative and balanced summary of what was done and what was found                                                                                                          | 2       |
| <b>Introduction</b>          |         |                                                                                                                                                                                                              |         |
| Background/rationale         | 2       | Explain the scientific background and rationale for the investigation being reported                                                                                                                         | 3       |
| Objectives                   | 3       | State specific objectives, including any prespecified hypotheses                                                                                                                                             | 3       |
| <b>Methods</b>               |         |                                                                                                                                                                                                              |         |
| Study design                 | 4       | Present key elements of study design early in the paper                                                                                                                                                      | 3       |
| Setting                      | 5       | Describe the setting, locations, and relevant dates, including periods of recruitment, exposure, follow-up, and data collection                                                                              | 3-4     |
| Participants                 | 6       | (a) Give the eligibility criteria, and the sources and methods of selection of participants                                                                                                                  | 3-4     |
| Variables                    | 7       | Clearly define all outcomes, exposures, predictors, potential confounders, and effect modifiers. Give diagnostic criteria, if applicable                                                                     | 4-5     |
| Data sources/<br>measurement | 8*      | For each variable of interest, give sources of data and details of methods of assessment (measurement). Describe comparability of assessment methods if there is more than one group                         | 4-5     |
| Bias                         | 9       | Describe any efforts to address potential sources of bias                                                                                                                                                    | 4-5     |
| Study size                   | 10      | Explain how the study size was arrived at                                                                                                                                                                    | 4       |
| Quantitative variables       | 11      | Explain how quantitative variables were handled in the analyses. If applicable, describe which groupings were chosen and why                                                                                 | 4       |
| Statistical methods          | 12      | (a) Describe all statistical methods, including those used to control for confounding                                                                                                                        | 5       |
|                              |         | (b) Describe any methods used to examine subgroups and interactions                                                                                                                                          | 5       |
|                              |         | (c) Explain how missing data were addressed                                                                                                                                                                  | 5       |
|                              |         | (d) If applicable, describe analytical methods taking account of sampling strategy                                                                                                                           |         |
|                              |         | (e) Describe any sensitivity analyses                                                                                                                                                                        |         |
| <b>Results</b>               |         |                                                                                                                                                                                                              |         |
| Participants                 | 13*     | (a) Report numbers of individuals at each stage of study—eg numbers potentially eligible, examined for eligibility, confirmed eligible, included in the study, completing follow-up, and analysed            | 6       |
|                              |         | (b) Give reasons for non-participation at each stage                                                                                                                                                         |         |
|                              |         | (c) Consider use of a flow diagram                                                                                                                                                                           |         |
| Descriptive data             | 14*     | (a) Give characteristics of study participants (eg demographic, clinical, social) and information on exposures and potential confounders                                                                     | 6       |
|                              |         | (b) Indicate number of participants with missing data for each variable of interest                                                                                                                          |         |
| Outcome data                 | 15*     | Report numbers of outcome events or summary measures                                                                                                                                                         | 6-7     |
| Main results                 | 16      | (a) Give unadjusted estimates and, if applicable, confounder-adjusted estimates and their precision (eg, 95% confidence interval). Make clear which confounders were adjusted for and why they were included | 6-7     |

|                          |    |                                                                                                                                                                            |     |
|--------------------------|----|----------------------------------------------------------------------------------------------------------------------------------------------------------------------------|-----|
|                          |    | (b) Report category boundaries when continuous variables were categorized                                                                                                  |     |
|                          |    | (c) If relevant, consider translating estimates of relative risk into absolute risk for a meaningful time period                                                           |     |
| Other analyses           | 17 | Report other analyses done—eg analyses of subgroups and interactions, and sensitivity analyses                                                                             |     |
| <b>Discussion</b>        |    |                                                                                                                                                                            |     |
| Key results              | 18 | Summarise key results with reference to study objectives                                                                                                                   | 7   |
| Limitations              | 19 | Discuss limitations of the study, taking into account sources of potential bias or imprecision. Discuss both direction and magnitude of any potential bias                 | 7-8 |
| Interpretation           | 20 | Give a cautious overall interpretation of results considering objectives, limitations, multiplicity of analyses, results from similar studies, and other relevant evidence | 7-9 |
| Generalisability         | 21 | Discuss the generalisability (external validity) of the study results                                                                                                      | 8-9 |
| <b>Other information</b> |    |                                                                                                                                                                            |     |
| Funding                  | 22 | Give the source of funding and the role of the funders for the present study and, if applicable, for the original study on which the present article is based              | 9   |

\*Give information separately for exposed and unexposed groups.

**Note:** An Explanation and Elaboration article discusses each checklist item and gives methodological background and published examples of transparent reporting. The STROBE checklist is best used in conjunction with this article (freely available on the Web sites of PLoS Medicine at <http://www.plosmedicine.org/>, Annals of Internal Medicine at <http://www.annals.org/>, and Epidemiology at <http://www.epidem.com/>). Information on the STROBE Initiative is available at [www.strobe-statement.org](http://www.strobe-statement.org).
