# Supplementary material for: Are adverse childhood experiences associated with late-life cognitive performance across racial/ethnic groups: results from the Kaiser Healthy Aging and Diverse Life Experiences study baseline
Source: PubMed Central journal article supplement — BMJ Open. 2021 Feb 5;11(2):e042125. doi: 10.1136/bmjopen-2020-042125 (PMC7925876; doi:10.1136/bmjopen-2020-042125), 2021-02-05
Supplement: bmjopen-2020-042125supp001.pdf [file bmjopen-2020-042125supp001.pdf]

**Results from Asian and semantic memory omnibus testing****Appendix Table 1. Regression estimates for the interaction of composite ACE score, race/ethnicity, and the domain of the cognitive measure.**

| <b>Variable</b>               | <b>Beta Coef.</b> | <b>Confidence intervals</b> | <b>P-value</b> |
|-------------------------------|-------------------|-----------------------------|----------------|
| Composite ACE score*          | 0.01              | (-0.06, 0.08)               | 0.81           |
| Asian executive               | ref               | ref                         |                |
| Asian semantic by ACE score   | 0.13              | (0.04, 0.21)                | 0.00           |
| Asian verbal by ACE score     | 0.00              | (-0.08, 0.08)               | 0.99           |
| Black executive by ACE score  | 0.02              | (-0.08, 0.11)               | 0.71           |
| Black semantic by ACE score   | -0.01             | (-0.10, 0.09)               | 0.92           |
| Black verbal by ACE score     | -0.002            | (-0.10, 0.09)               | 0.97           |
| Latino executive by ACE score | -0.03             | (-0.12, 0.07)               | 0.61           |
| Latino semantic by ACE score  | -0.00             | (-0.10, 0.10)               | 0.99           |
| Latino verbal by ACE score    | -0.01             | (-0.11, 0.09)               | 0.90           |
| White executive by ACE score  | -0.04             | (-0.13, 0.05)               | 0.40           |
| White semantic by ACE score   | -0.02             | (-0.11, 0.07)               | 0.67           |
| White verbal by ACE score     | -0.01             | (-0.10, 0.08)               | 0.87           |
| <b>F-test</b>                 | <b>0.10</b>       |                             |                |

\* The main effect of for Composite ACE score refers to the estimate for executive function among Asian American respondents. All other terms refer to the deviation from that effect for the specified racial/ethnic group in the specified cognitive domain. The P-value tests whether that deviation is consistent with the null.

**Appendix Table 2. Final regression model results estimating one effect of composite ACE score on semantic memory among Asian American respondents and another effect for all other racial/ethnic group and cognitive domain combinations.**

| <b>Variables</b>                                                                     | <b>Beta Coef.</b> | <b>Confidence intervals</b> | <b>P-value</b> |
|--------------------------------------------------------------------------------------|-------------------|-----------------------------|----------------|
| Composite score main effect                                                          | 0.01              | (-0.01 , 0.03)              | 0.42           |
| Composite score by indicator for Asian respondents predicting semantic memory domain | -0.03             | (-0.10 , 0.03)              | 0.34           |
| Asian semantic                                                                       | -0.11             | (-0.21 , -0.02)             | 0.02           |
| Asian verbal                                                                         | 0.34              | (0.23 , 0.46)               | <0.00          |
| Black executive                                                                      | -0.31             | (-0.43 , -0.19)             | <0.00          |
| Black semantic                                                                       | -0.56             | (-0.68 , -0.44)             | <0.00          |
| Black verbal                                                                         | -0.20             | (-0.32 , -0.08)             | <0.00          |
| Latino executive                                                                     | -0.06             | (-0.18 , 0.06)              | 0.32           |
| Latino semantic                                                                      | 0.23              | (0.10 , 0.35)               | 0.00           |
| Latino verbal                                                                        | 0.01              | (-0.11 , 0.13)              | 0.89           |
| White executive                                                                      | 0.51              | (0.40 , 0.62)               | <0.01          |
| White semantic                                                                       | 0.61              | (0.50 , 0.72)               | <0.01          |
| White verbal                                                                         | 0.09              | (-0.02 , 0.20)              | 0.11           |

**Appendix Table 3. Mixed effects linear regression coefficients (95% confidence intervals) for the difference in cognitive scores associated with total childhood or age-specific count of ACEs (0 to 4+), overall and stratified by race/ethnicity. [with Asian Semantic Memory]**

|                                 | <b>Total childhood ACEs</b> | <b>Early childhood (0-6 years) ACEs</b> | <b>Middle childhood (7-12 years) ACEs</b> | <b>Adolescent (13-16 years) ACEs</b> |
|---------------------------------|-----------------------------|-----------------------------------------|-------------------------------------------|--------------------------------------|
|                                 | <b>Beta (95% CI)</b>        | <b>Beta (CI)</b>                        | <b>Beta (CI)</b>                          | <b>Beta (CI)</b>                     |
| Full sample                     | 0.01 (-0.01, 0.03)          | 0.01 (-0.03, 0.05)                      | -0.03 (-0.07, 0.01)                       | 0.01 (-0.05, 0.06)                   |
| White                           | 0.00 (-0.04, 0.05)          | 0.01 (-0.05, 0.08)                      | -0.03 (-0.09, 0.03)                       | 0.07 (-0.03, 0.17)                   |
| Black                           | 0.01 (-0.03, 0.05)          | 0.04 (-0.02, 0.10)                      | -0.03 (-0.09, 0.03)                       | -0.01 (-0.09, 0.08)                  |
| Asian-American                  | 0.07 (0.01, 0.14)           | 0.06 (-0.05, 0.17)                      | 0.00 (-0.11, .10)                         | -0.12 (-0.24, 0.00)                  |
| Asian American, Semantic memory | 0.01(-0.06, 0.08)           | 0.05 (-0.06, 0.15)                      | 0.01 (-.09, 0.11)                         | -0.08 (-0.21, 0.04)                  |
| Latino                          | -0.01(-0.06, 0.04)          | -0.04(-0.10, 0.03)                      | -0.01 (-0.08, 0.05)                       | 0.03 (-0.06, 0.13)                   |

\* All models adjusted for age (linear and quadratic), sex, parental education and race/ethnicity (unless stratified by race/ethnicity).

\*\* This table matches Table 2 in the manuscript, with the addition of the coefficients for ACE association with semantic memory among Asian American

**Table 4. Mixed effects linear regression coefficients (95% confidence intervals) for the difference in memory scores associated with each ACE, overall and stratified by race/ethnicity.**

| ACEs                      | Overall                | White                 | Black                 | Asian                 | Asian, semantic        | Latino                 |
|---------------------------|------------------------|-----------------------|-----------------------|-----------------------|------------------------|------------------------|
| Parents divorced          | -0.03<br>(-0.11,0.04)  | -0.10<br>(-0.24,0.04) | -0.03<br>(-0.15,0.09) | 0.09<br>(-0.16,0.35)  | 0.20<br>(-0.11, 0.52)  | -0.00<br>(-0.14,0.14)  |
| Parents remarried         | -0.11<br>(-0.20,-0.03) | -0.10<br>(-0.26,0.07) | -0.04<br>(-0.18,0.09) | -0.08<br>(-0.34,0.19) | -0.24<br>(-0.57, 0.08) | -0.18<br>(-0.34,-0.03) |
| Domestic violence         | 0.01<br>(-0.06,0.08)   | 0.07<br>(-0.07,0.21)  | -0.00<br>(-0.12,0.12) | 0.19<br>(0.00,0.38)   | -0.02<br>(-0.25, 0.21) | -0.07<br>(-0.21,0.06)  |
| Witnessed substance abuse | -0.06<br>(-0.14,0.01)  | -0.08<br>(-0.21,0.06) | 0.02<br>(-0.11,0.15)  | 0.18<br>(-0.10,0.46)  | -0.04<br>(-0.39, 0.30) | -0.16<br>(-0.29,-0.02) |
| Parent job loss           | 0.04<br>(-0.04,0.11)   | 0.10<br>(-0.04,0.23)  | -0.04<br>(-0.19,0.10) | 0.16<br>(-0.04,0.37)  | 0.08<br>(-0.17, 0.34)  | -0.04<br>(-0.19,0.12)  |
| Parent in jail            | -0.10<br>(-0.21,0.01)  | -0.16<br>(-0.43,0.10) | -0.09<br>(-0.27,0.08) | 0.17<br>(-0.11,0.45)  | -0.16<br>(-0.51, 0.19) | -0.13<br>(-0.32,0.05)  |
| Family member illness     | 0.02<br>(-0.04,0.08)   | 0.06<br>(-0.06,0.17)  | -0.05<br>(-0.17,0.06) | 0.11<br>(-0.04,0.26)  | 0.04<br>(-0.14, 0.22)  | 0.00<br>(-0.12,0.13)   |
| Death of mother           | -0.18<br>(-0.30,-0.07) | -0.10<br>(-0.34,0.14) | -0.15<br>(-0.36,0.06) | -0.19<br>(-0.48,0.10) | -0.54<br>(-0.89,-0.18) | -0.29<br>(-0.49,-0.09) |
| Death of father           | -0.11<br>(-0.20,-0.01) | 0.05<br>(-0.15,0.25)  | -0.14<br>(-0.31,0.03) | -0.10<br>(-0.33,0.12) | -0.08<br>(-0.36, 0.20) | -0.21<br>(-0.39,-0.02) |

**All models adjusted for age (linear and quadratic), sex, parental education, and race/ethnicity (unless stratified by race/ethnicity). \*\* This table matches Table 3 in the manuscript, with the addition of the coefficients for ACE association with semantic memory among Asian American**

**Appendix Table 5. Association of ACEs based on interaction terms between race/ethnicity and ages ACE experienced**

|                          | Parents<br>divorced    | Parents<br>remarried   | Domestic<br>violence    | Witnessed<br>substance<br>abuse | Parent job<br>loss      | Parent in<br>jail      | Family member<br>illness | Death of<br>mother     | Death of<br>father     |
|--------------------------|------------------------|------------------------|-------------------------|---------------------------------|-------------------------|------------------------|--------------------------|------------------------|------------------------|
|                          | $\beta$ (95% CI)       | $\beta$ (95% CI)       | $\beta$ (95% CI)        | $\beta$ (95% CI)                | $\beta$ (95% CI)        | $\beta$ (95% CI)       | $\beta$ (95% CI)         | $\beta$ (95% CI)       | $\beta$ (95% CI)       |
| <b>Black,<br/>0-6</b>    | 0.23<br>(-0.00, 0.46)  | -0.02<br>(-0.42, 0.37) | 0.12<br>(-0.18, 0.42)   | 0.07<br>(-0.27, 0.41)           | -0.15<br>(-0.59, 0.29)  | -0.31<br>(-1.17, 0.54) | 0.04<br>(-0.26, 0.33)    | -0.05<br>(-0.90, 0.80) | 0.35<br>(-0.17, 0.87)  |
| <b>Black,<br/>7-12</b>   | -0.13<br>(-0.45, 0.20) | 0.43<br>(0.11, 0.76)   | -0.15<br>(-0.40, 0.11)  | 0.09<br>(-0.19, 0.37)           | 0.10<br>(-0.19, 0.40)   | 0.43<br>(-0.14, 0.99)  | 0.00<br>(-0.22, 0.22)    | -0.00<br>(-0.73, 0.73) | -0.49<br>(-1.07, 0.08) |
| <b>Black,<br/>13-16</b>  | -0.03<br>(-0.53, 0.47) | 0.04<br>(-0.41, 0.49)  | -0.12<br>(-0.62, 0.37)  | 0.30<br>(-0.08, 0.69)           | -0.35*<br>(-0.74, 0.03) | 0.43<br>(-0.52, 1.39)  | -0.08<br>(-0.38, 0.22)   | -0.40<br>(-0.97, 0.18) | -0.17<br>(-0.59, 0.26) |
| <b>Latino,<br/>0-6</b>   | 0.28<br>(0.02, 0.53)   | -0.08<br>(-0.48, 0.32) | -0.03<br>(-0.33, 0.26)  | -0.10<br>(-0.40, 0.21)          | -0.56<br>(-0.95, -0.17) | -0.05<br>(-0.98, 0.87) | -0.17<br>(-0.47, 0.12)   | 0.15<br>(-0.53, 0.82)  | 0.29<br>(-0.26, 0.84)  |
| <b>Latino,<br/>7-12</b>  | 0.14<br>(-0.21, 0.48)  | 0.43<br>(0.07, 0.80)   | -0.17<br>(-0.45, 0.10)  | -0.07<br>(-0.33, 0.20)          | 0.22<br>(-0.09, 0.53)   | 0.18<br>(-0.38, 0.74)  | 0.02<br>(-0.20, 0.24)    | 0.02<br>(-0.76, 0.80)  | -0.25<br>(-0.75, 0.26) |
| <b>Latino,<br/>13-16</b> | -0.04<br>(-0.55, 0.47) | -0.02<br>(-0.49, 0.44) | -0.31<br>(-0.91, 0.28)  | -0.11<br>(-0.50, 0.29)          | 0.00<br>(-0.46, 0.46)   | 0.36<br>(-0.58, 1.29)  | 0.19<br>(-0.13, 0.52)    | -0.10<br>(-0.70, 0.49) | -0.24<br>(-0.75, 0.28) |
| <b>Asian,<br/>0-6</b>    | 0.34<br>(-0.03, 0.71)  | -0.10<br>(-0.68, 0.48) | 0.29<br>(-0.06, 0.64)   | 0.31<br>(-0.15, 0.78)           | -0.03<br>(-0.50, 0.44)  | 0.09<br>(-0.70, 0.88)  | 0.06<br>(-0.23, 0.34)    | -0.09<br>(-0.74, 0.57) | 0.25<br>(-0.25, 0.75)  |
| <b>Asian,<br/>7-12</b>   | -0.05<br>(-0.53, 0.43) | 0.28<br>(-0.16, 0.72)  | 0.05<br>(-0.26, 0.35)   | 0.34<br>(-0.19, 0.86)           | 0.31<br>(-0.02, 0.64)   | 0.40<br>(-0.25, 1.06)  | 0.08<br>(-0.14, 0.30)    | -0.10<br>(-1.15, 0.95) | -0.45<br>(-1.05, 0.14) |
| <b>Asian,<br/>13-16</b>  | 0.17<br>(-0.63, 0.97)  | -0.37<br>(-0.95, 0.22) | -0.59<br>(-1.18, -0.00) | -0.13<br>(-0.66, 0.40)          | -0.25<br>(-0.72, 0.21)  | -0.18<br>(-1.22, 0.87) | 0.15<br>(-0.17, 0.48)    | -0.10<br>(-0.51, 0.30) | -0.16<br>(-0.61, 0.29) |

|                         |                        |                         |                       |                        |                        |                        |                        |                        |                        |
|-------------------------|------------------------|-------------------------|-----------------------|------------------------|------------------------|------------------------|------------------------|------------------------|------------------------|
| <b>White,<br/>0-6</b>   | -0.15<br>(-0.32, 0.02) | -0.02<br>(-0.31, 0.28)  | 0.02<br>(-0.19, 0.24) | 0.02<br>(-0.22, 0.25)  | 0.26<br>(0.02, 0.50)   | 0.26<br>(-0.44, 0.95)  | 0.06<br>(-0.12, 0.23)  | -0.29<br>(-0.79, 0.20) | -0.36<br>(-0.73, 0.01) |
| <b>White,<br/>7-12</b>  | -0.01<br>0.95          | -0.41<br>(-0.65, -0.17) | 0.07<br>(-0.12, 0.27) | -0.09<br>(-0.27, 0.09) | -0.02<br>(-0.22, 0.17) | -0.37<br>(-0.83, 0.09) | 0.02<br>(-0.12, 0.16)  | 0.15<br>(-0.46, 0.76)  | 0.27<br>(-0.13, 0.68)  |
| <b>White,<br/>13-16</b> | 0.15<br>(-0.23, 0.54)  | 0.04<br>(-0.28, 0.36)   | 0.03<br>(-0.33, 0.40) | -0.12<br>(-0.38, 0.15) | 0.27<br>(0.01, 0.53)   | -0.27<br>(-1.12, 0.59) | -0.02<br>(-0.25, 0.20) | -0.32<br>(-0.91, 0.27) | 0.10<br>(-0.22, 0.42)  |

\* All models adjusted for age (linear and quadratic), sex, parental education and race/ethnicity (unless stratified by race/ethnicity).

\*\* All models provide a single coefficient for associations with verbal episodic memory, semantic memory, and executive function, with the exception that coefficients for ACE association with semantic memory among Asian Americans are estimated separately and presented in the supplement.
